# Supplementary material for: Linear Cu(i) chalcogenones: synthesis and application in borylation of unsymmetrical alkynes
Source: Royal Society of Chemistry journal article supplement (doi:10.1039/c5dt02320c), 2015-01-01
Supplement: c5dt02320c1.pdf [file c5dt02320c1.pdf]

# Linear Cu(I) Chalcogenones: Synthesis and Application in Borylation of Unsymmetrical Alkynes

Katam Srinivas, Chatla Naga Babu and Ganesan Prabusankar\*

Department of Chemistry, Indian Institute of Technology Hyderabad, ODF Campus,

Yeddumailaram, TS, INDIA-502 205.

Fax: +91 40 2301 6032; Tel: +91 40 2301 6089; E-mail: prabu@iith.ac.in

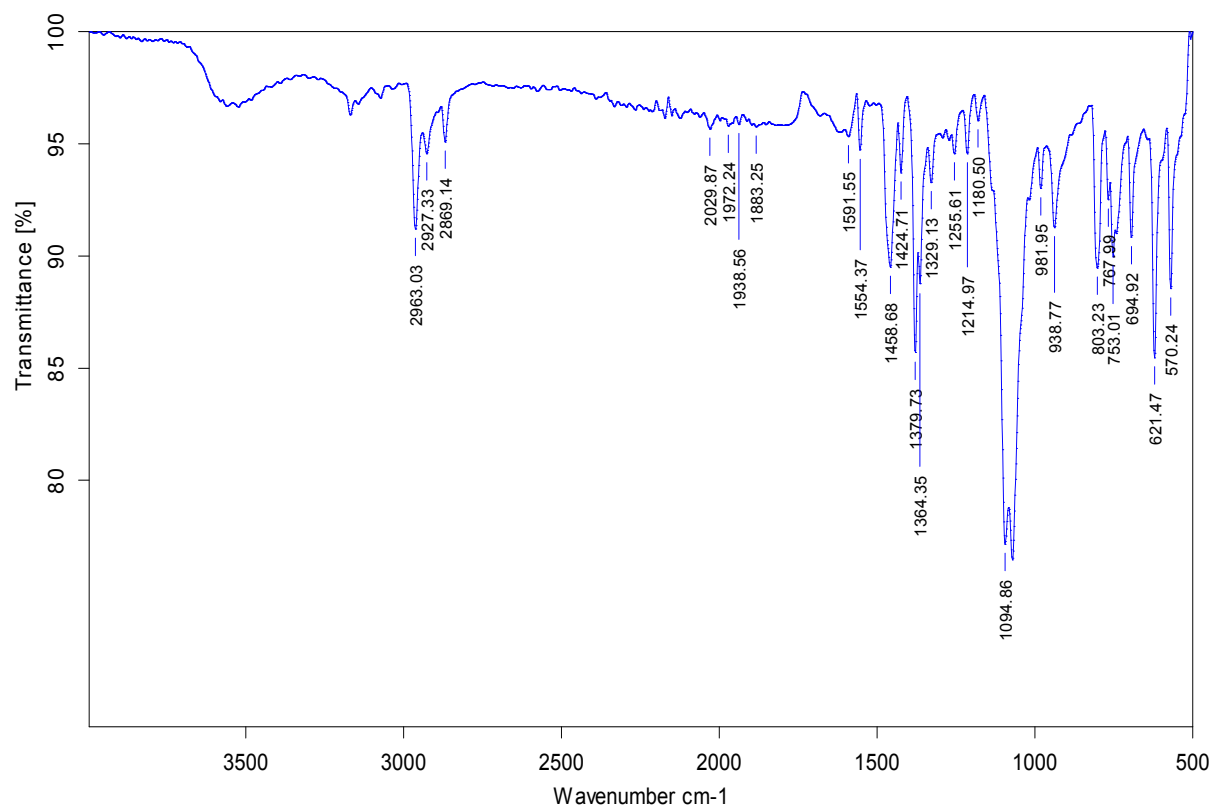

**Fig. S1.** Neat FT-IR spectrum of [(IPrS)<sub>2</sub>Cu]ClO<sub>4</sub> (**1**).

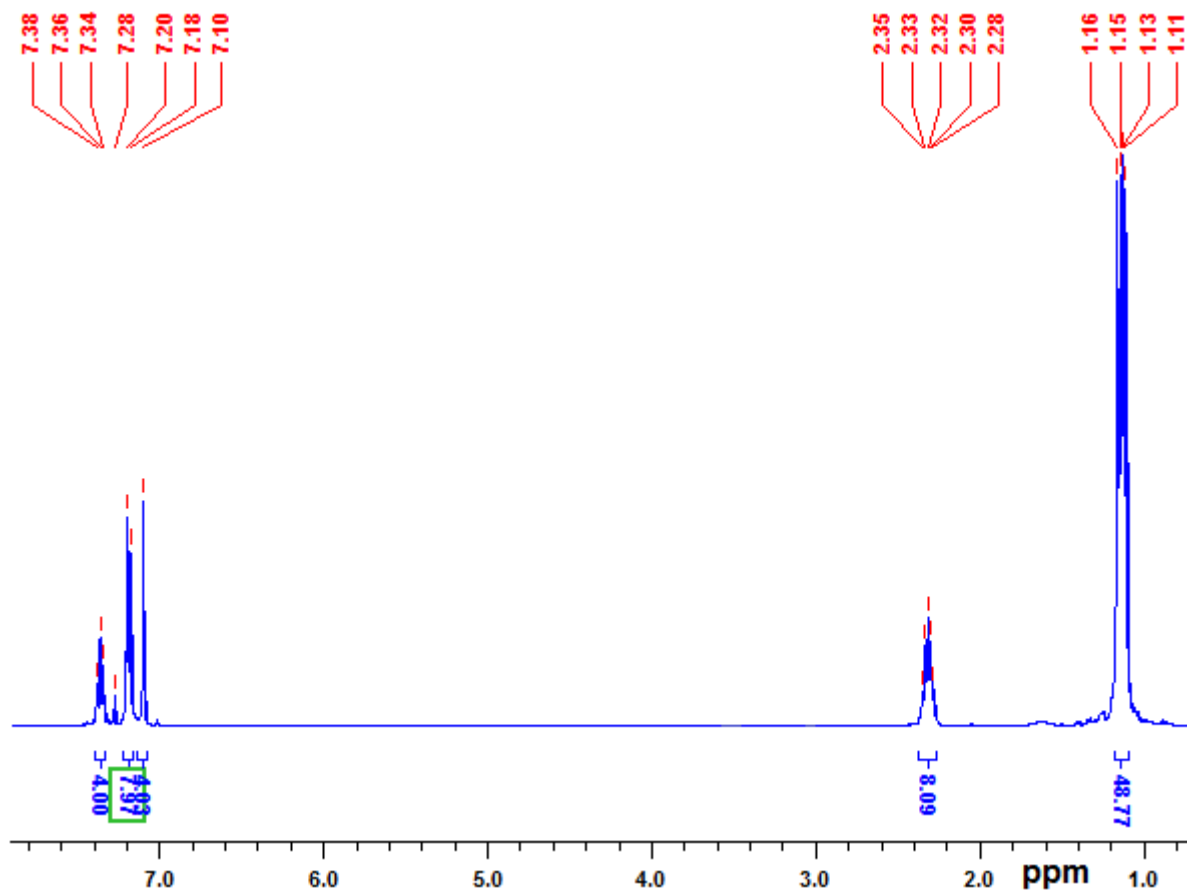

Fig. S2.  $^1\text{H}$  NMR spectrum of  $[(\text{IPrS})_2\text{Cu}]\text{ClO}_4$  (1).

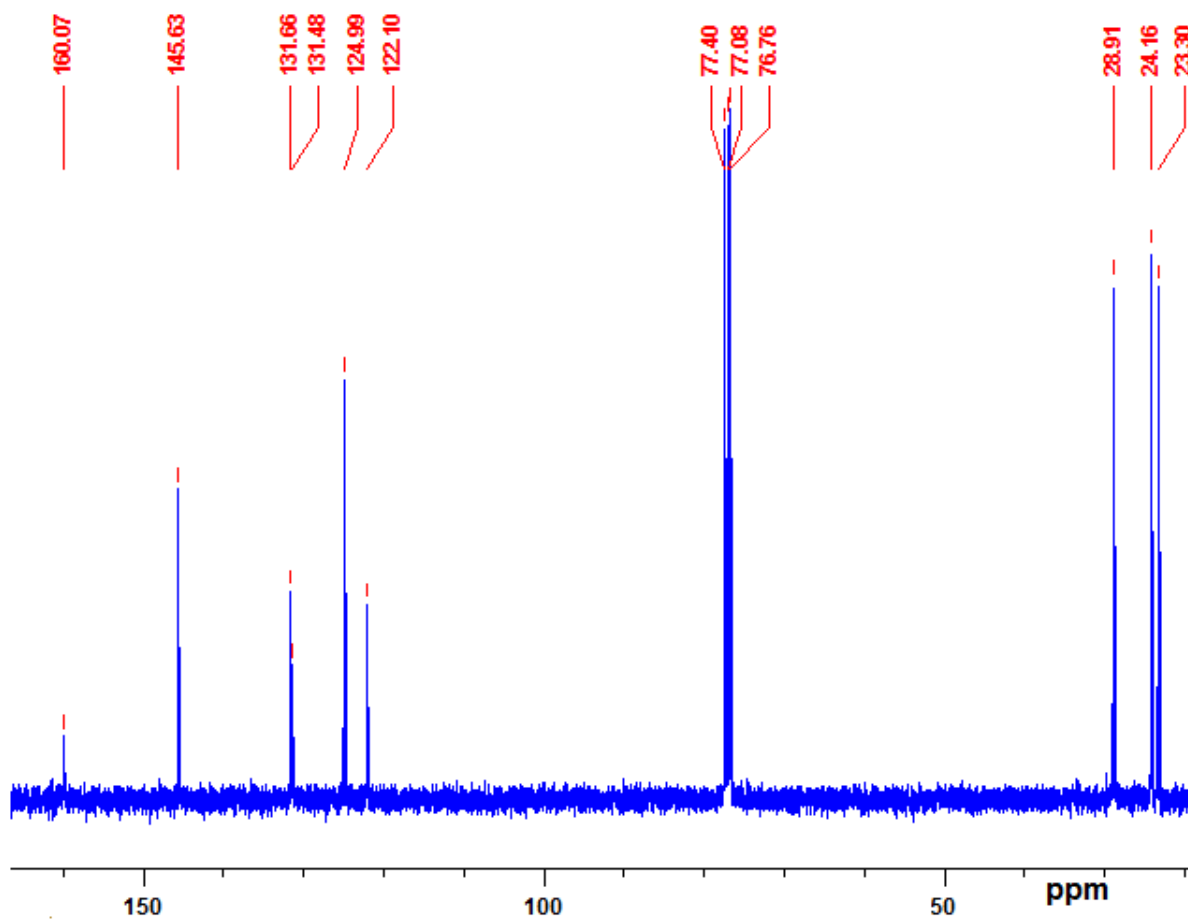

**Fig. S3.** <sup>13</sup>C NMR spectrum of [(IPrS)<sub>2</sub>Cu]ClO<sub>4</sub> (**1**).

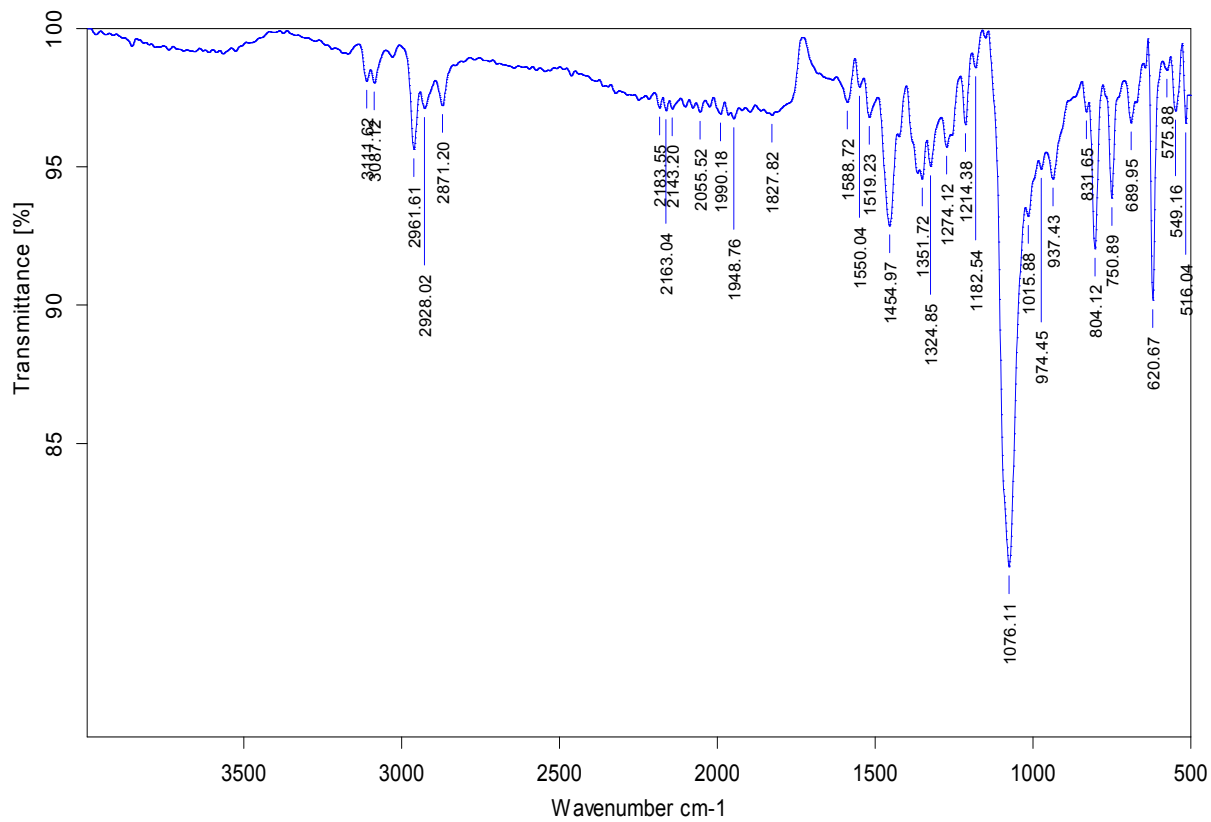

**Fig. S4.** Neat FT-IR spectrum of [(IPrSe)<sub>2</sub>Cu]ClO<sub>4</sub> (2).

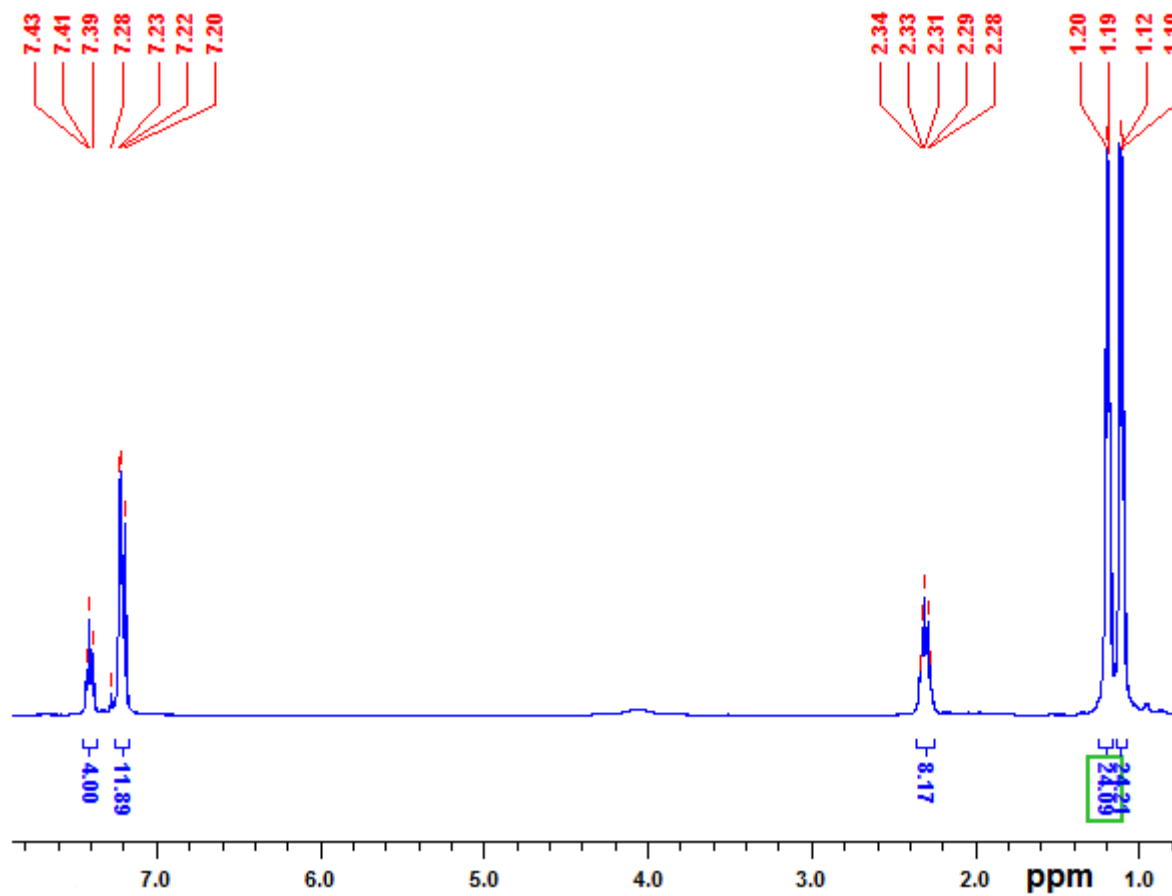

Fig. S5.  $^1\text{H}$  NMR spectrum of  $[(\text{IPrSe})_2\text{Cu}]\text{ClO}_4$  (2).

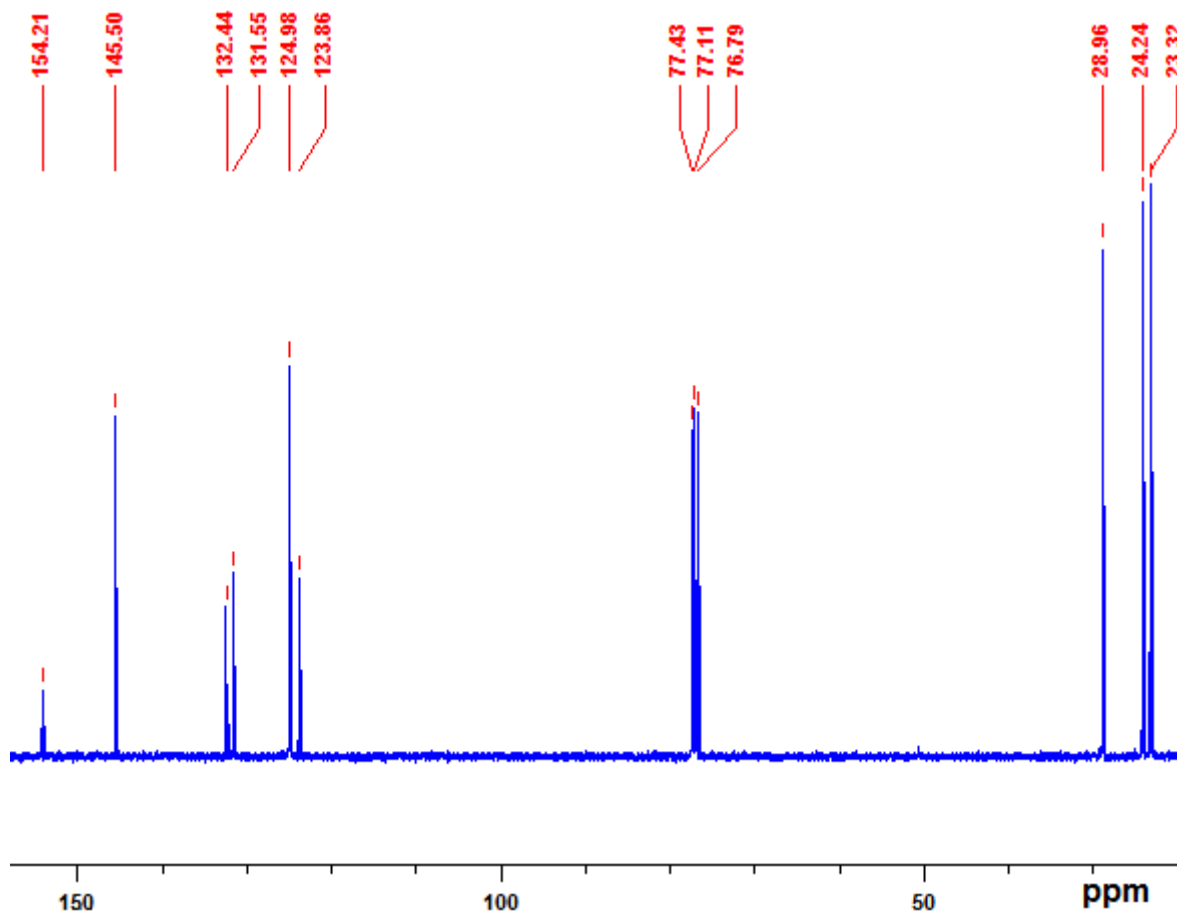

Fig. S6.  $^{13}\text{C}$  NMR spectrum of  $[(\text{IPrSe})_2\text{Cu}]\text{ClO}_4$  (2).

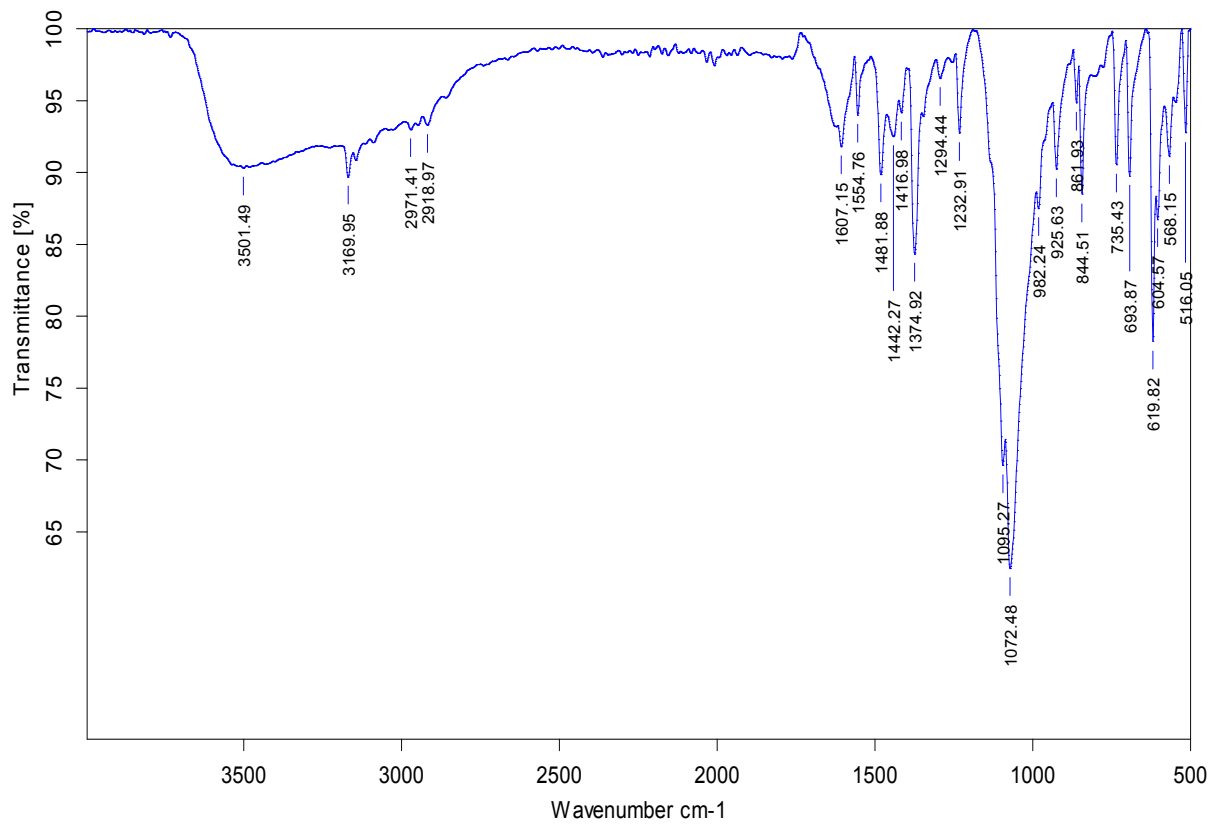

**Fig. S7.** Neat FT-IR spectrum of  $[(\text{IMes})_2\text{Cu}]\text{ClO}_4$  (**3**).

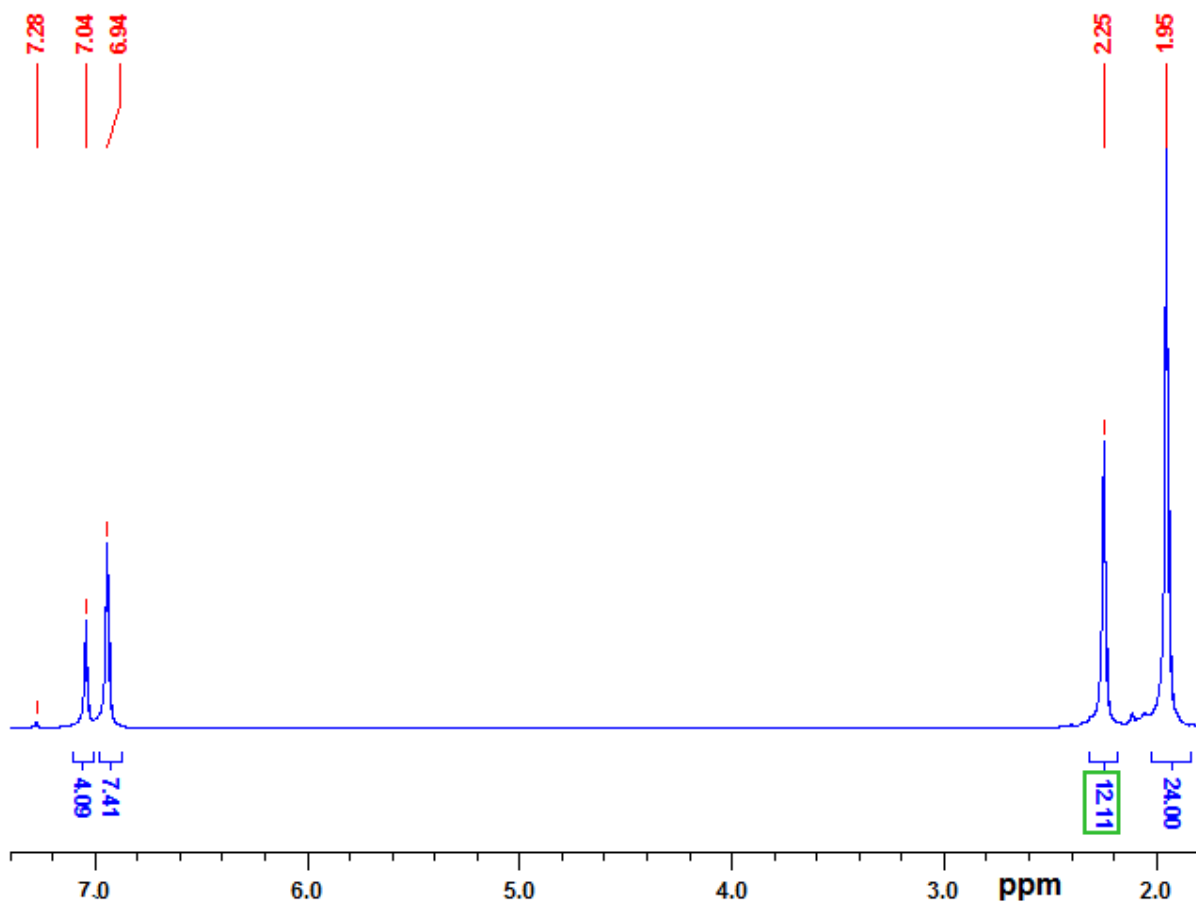

**Fig. S8.** <sup>1</sup>H NMR spectrum of [(IMesS)<sub>2</sub>Cu]ClO<sub>4</sub> (**3**).



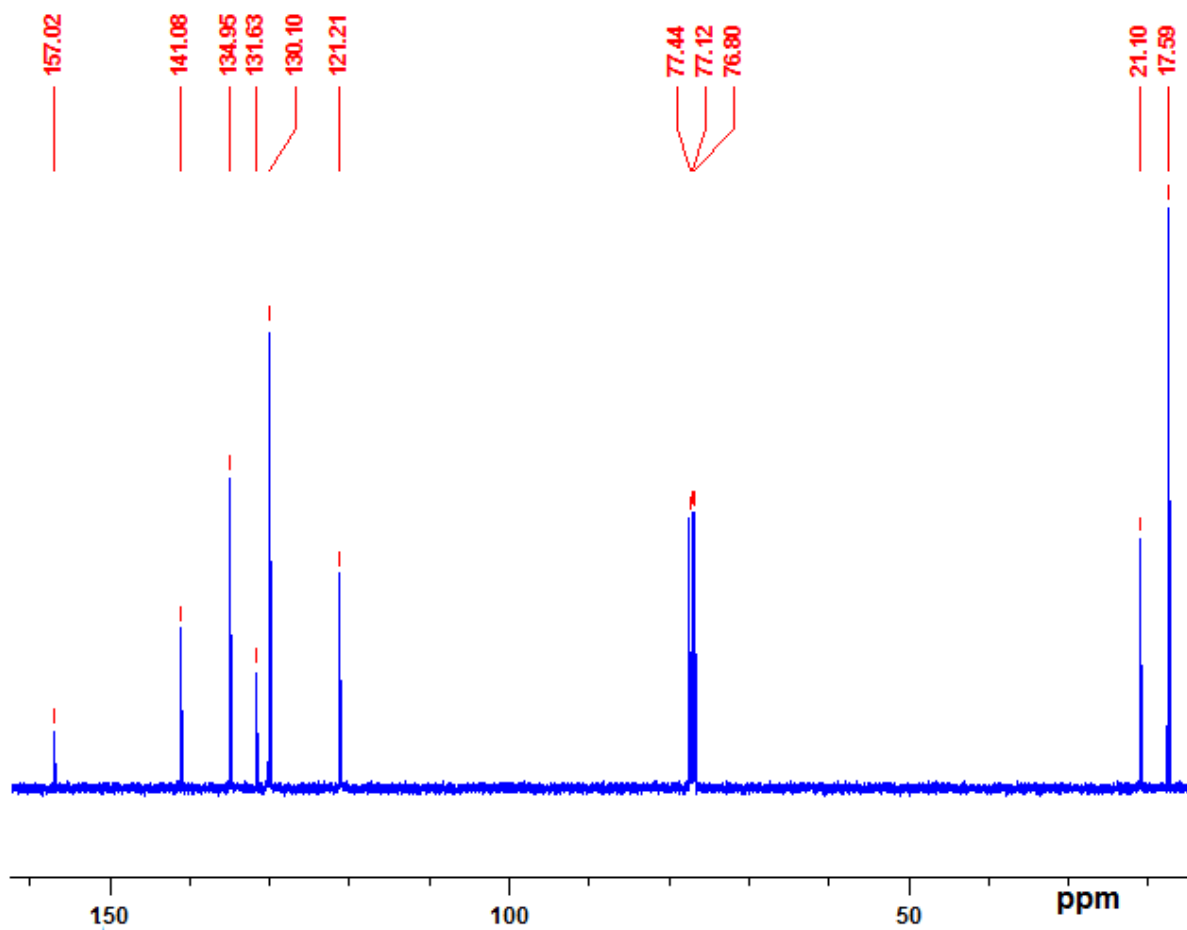

**Fig. S9.** <sup>13</sup>C NMR spectrum of [(IMesS)<sub>2</sub>Cu]ClO<sub>4</sub> (**3**).

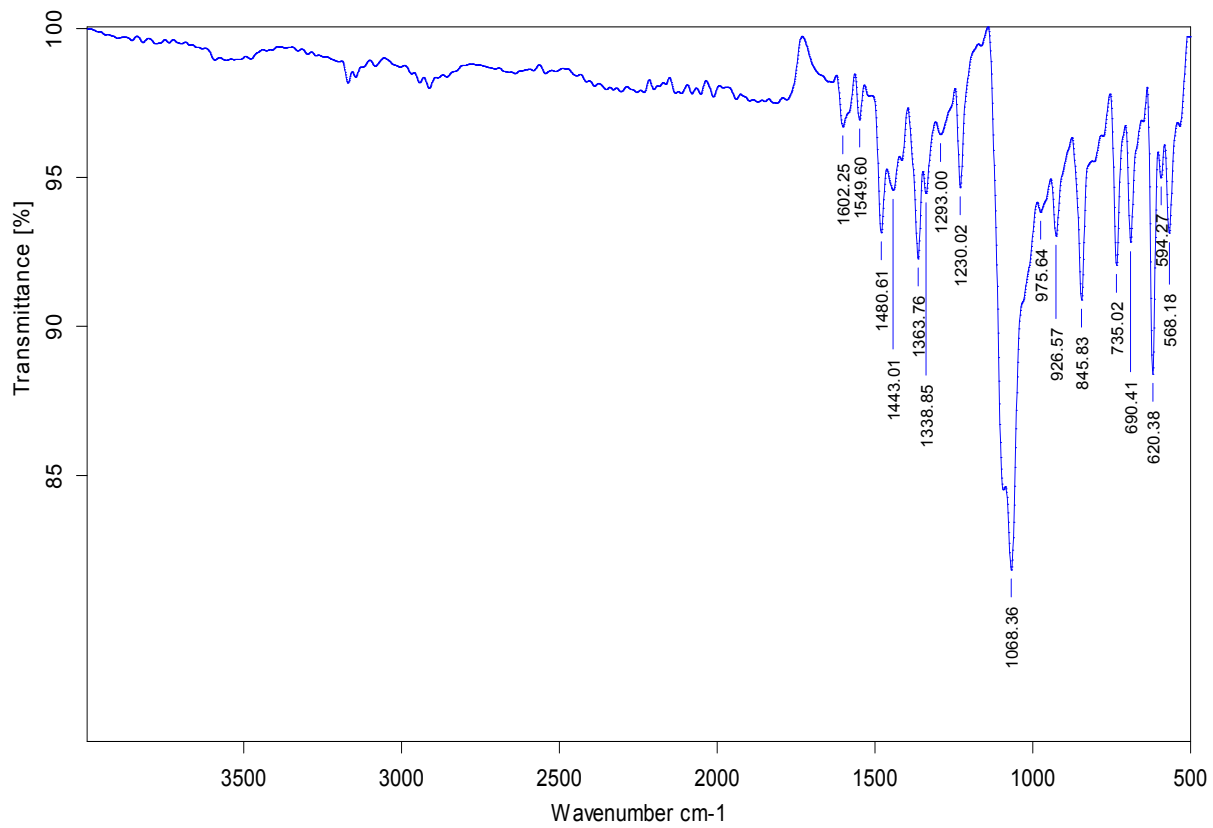

**Fig. S10.** Neat FT-IR spectrum of [(IMesSe)<sub>2</sub>Cu]ClO<sub>4</sub> (**4**).

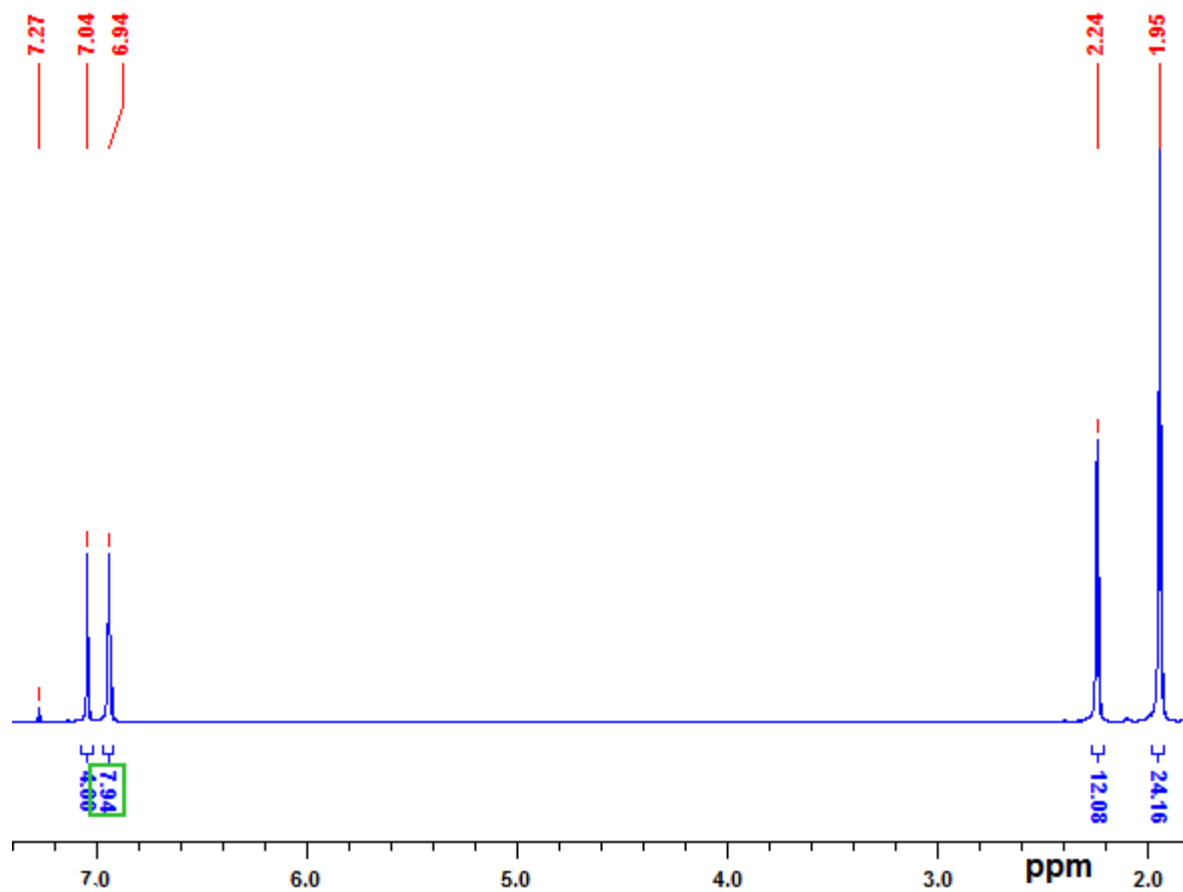

Fig. S11. <sup>1</sup>H NMR spectrum of [(IMesSe)<sub>2</sub>Cu]ClO<sub>4</sub> (4).

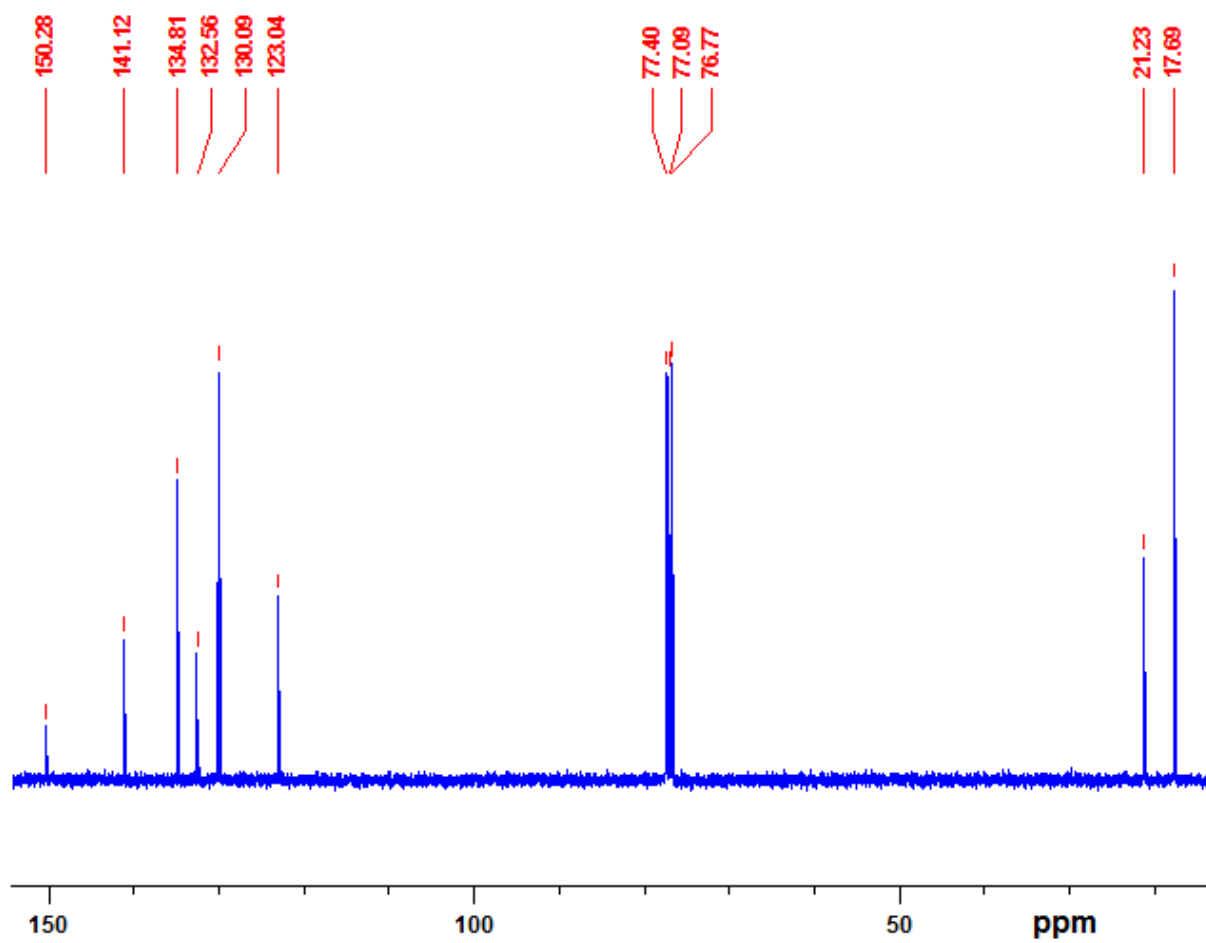

**Fig. S12.**  $^{13}\text{C}$  NMR spectrum of  $[(\text{IMesSe})_2\text{Cu}]\text{ClO}_4$  (4).

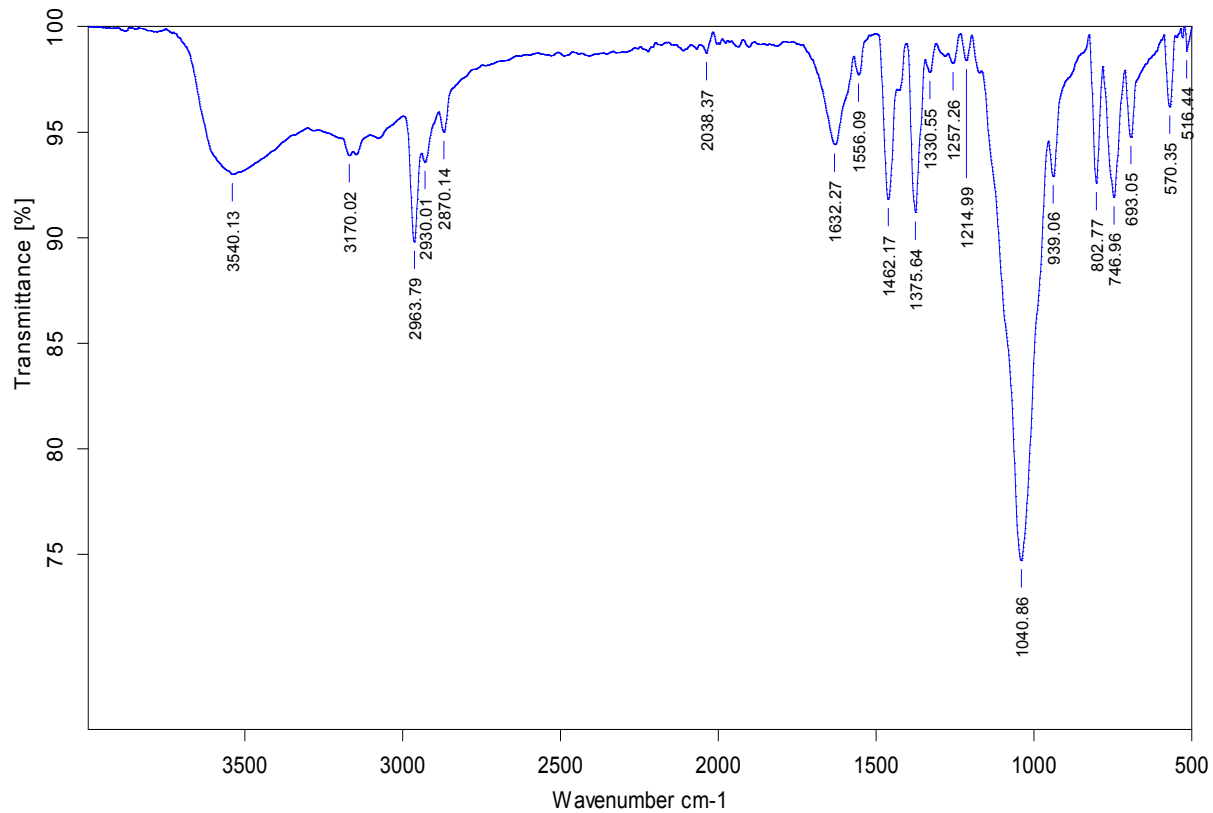

**Fig. S13.** Neat FT-IR spectrum of [(IPrS)<sub>2</sub>Cu]BF<sub>4</sub> (**5**).

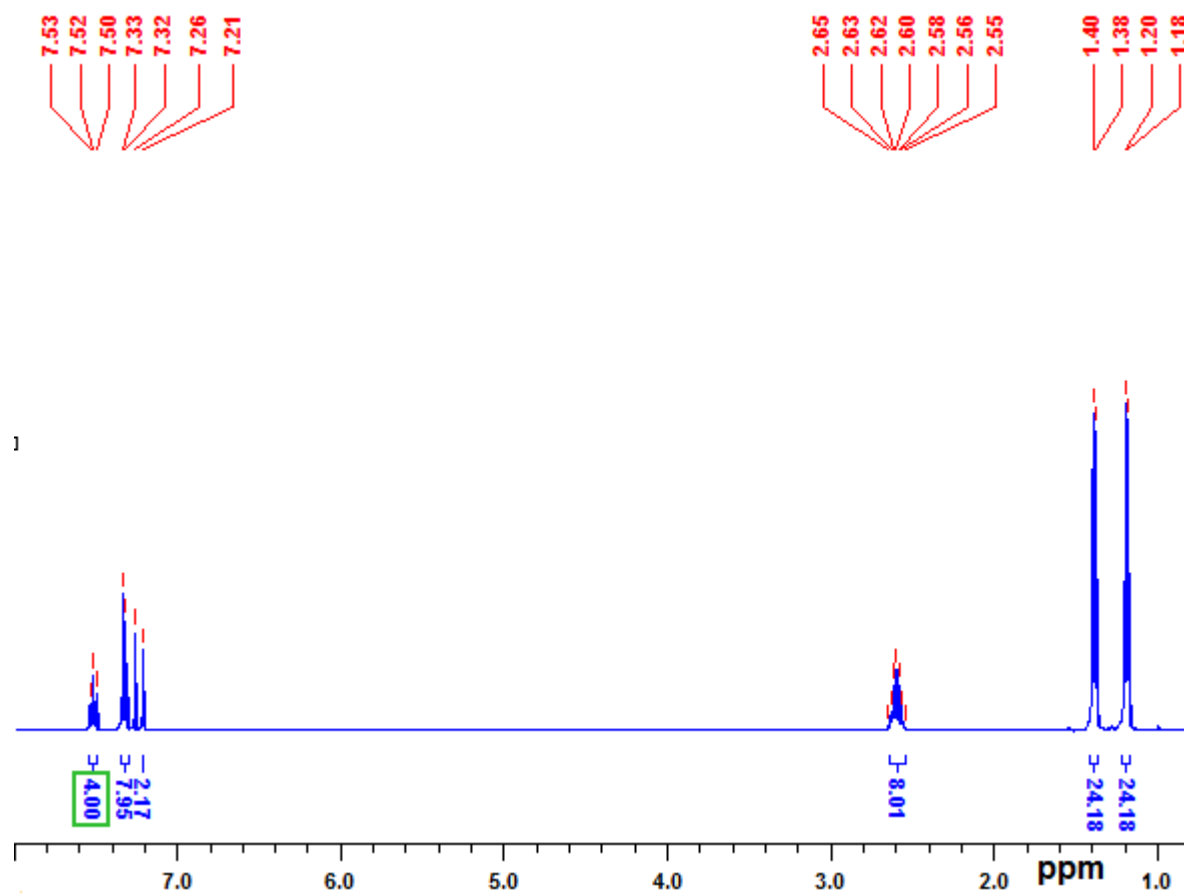

Fig. S14.  $^1\text{H}$  NMR spectrum of  $[(\text{IPrS})_2\text{Cu}]\text{BF}_4$  (5).

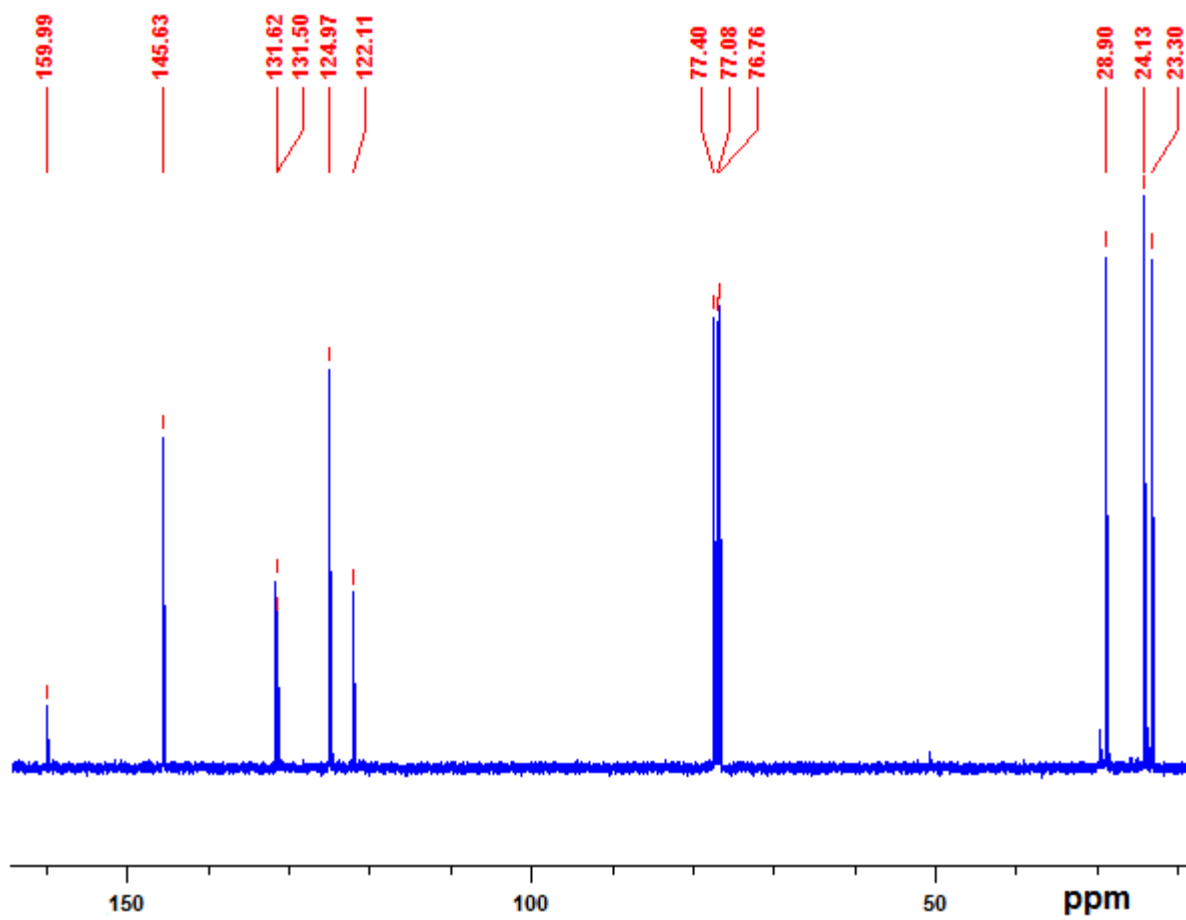

Fig. S15. <sup>13</sup>C NMR spectrum of [(IPrS)<sub>2</sub>Cu]BF<sub>4</sub> (5).

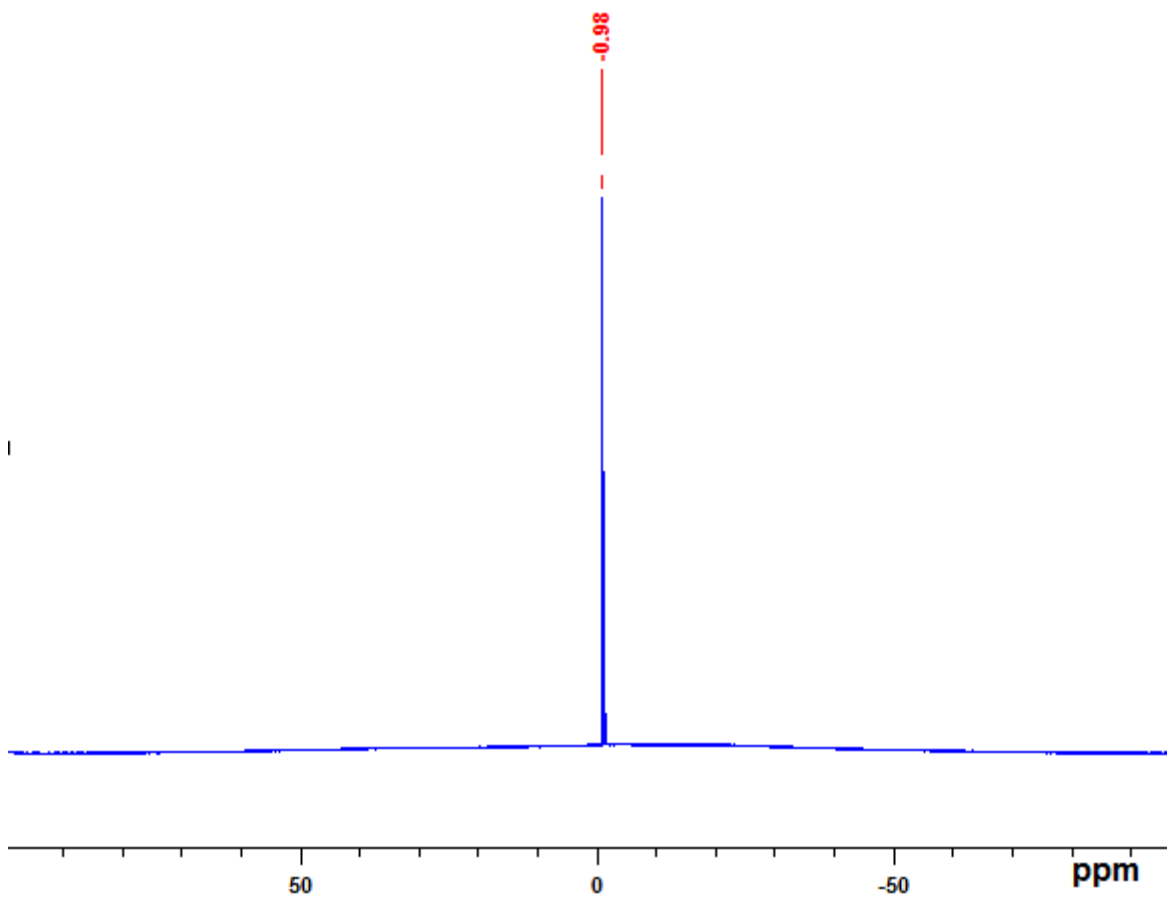

**Fig. S16.**  $^{11}\text{B}$  NMR spectrum of  $[(\text{IPrS})_2\text{Cu}]\text{BF}_4$  (**5**).



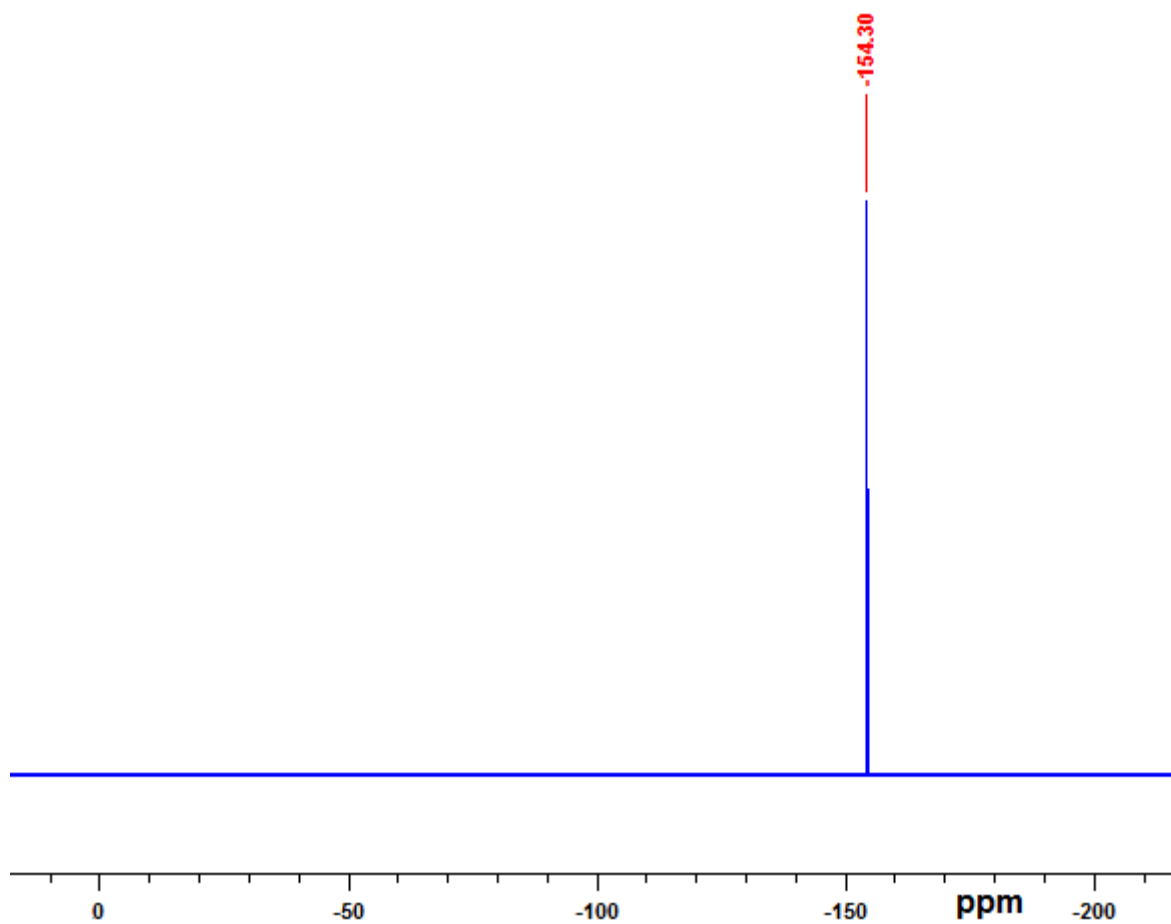

**Fig. S17.**  $^{19}\text{F}$  NMR spectrum of  $[(\text{IPrS})_2\text{Cu}]\text{BF}_4$  (**5**).

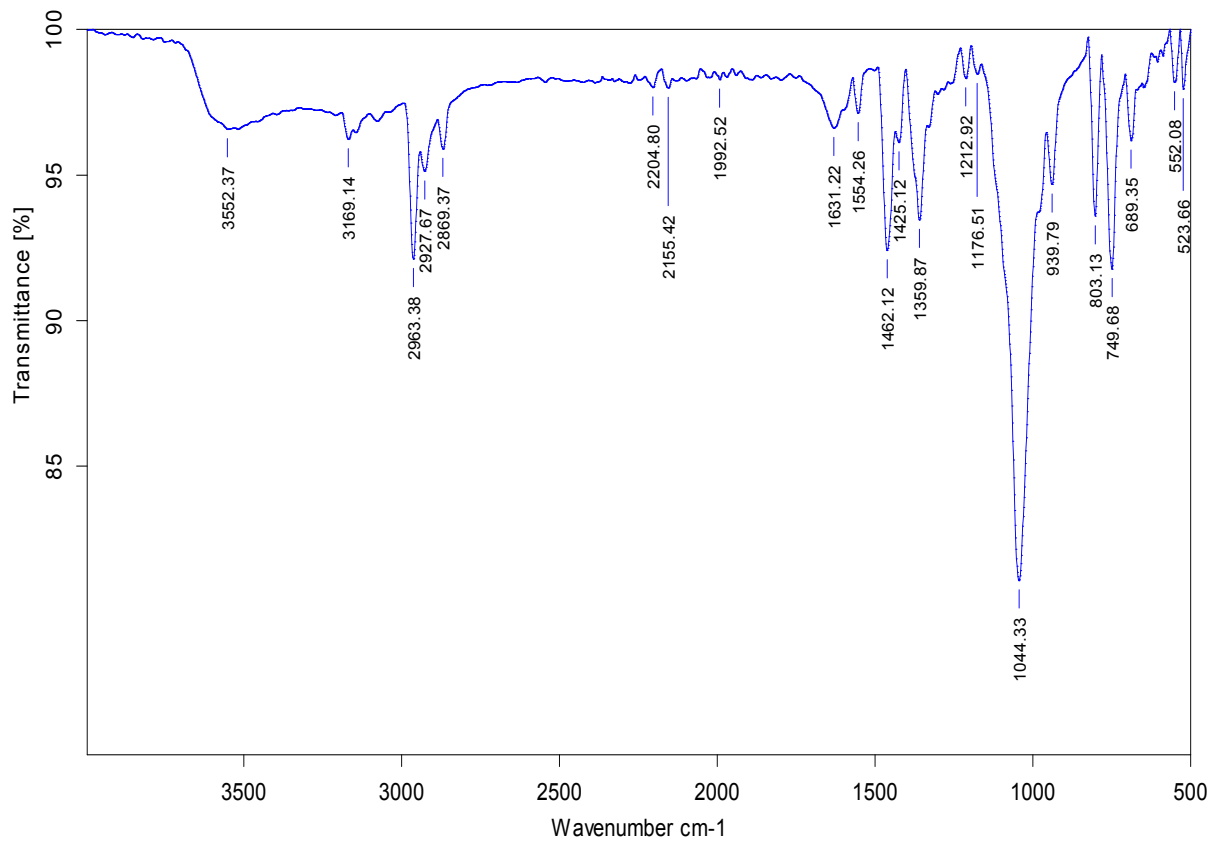

**Fig. S18.** Neat FT-IR spectrum of [(IPrSe)<sub>2</sub>Cu]BF<sub>4</sub> (**6**).

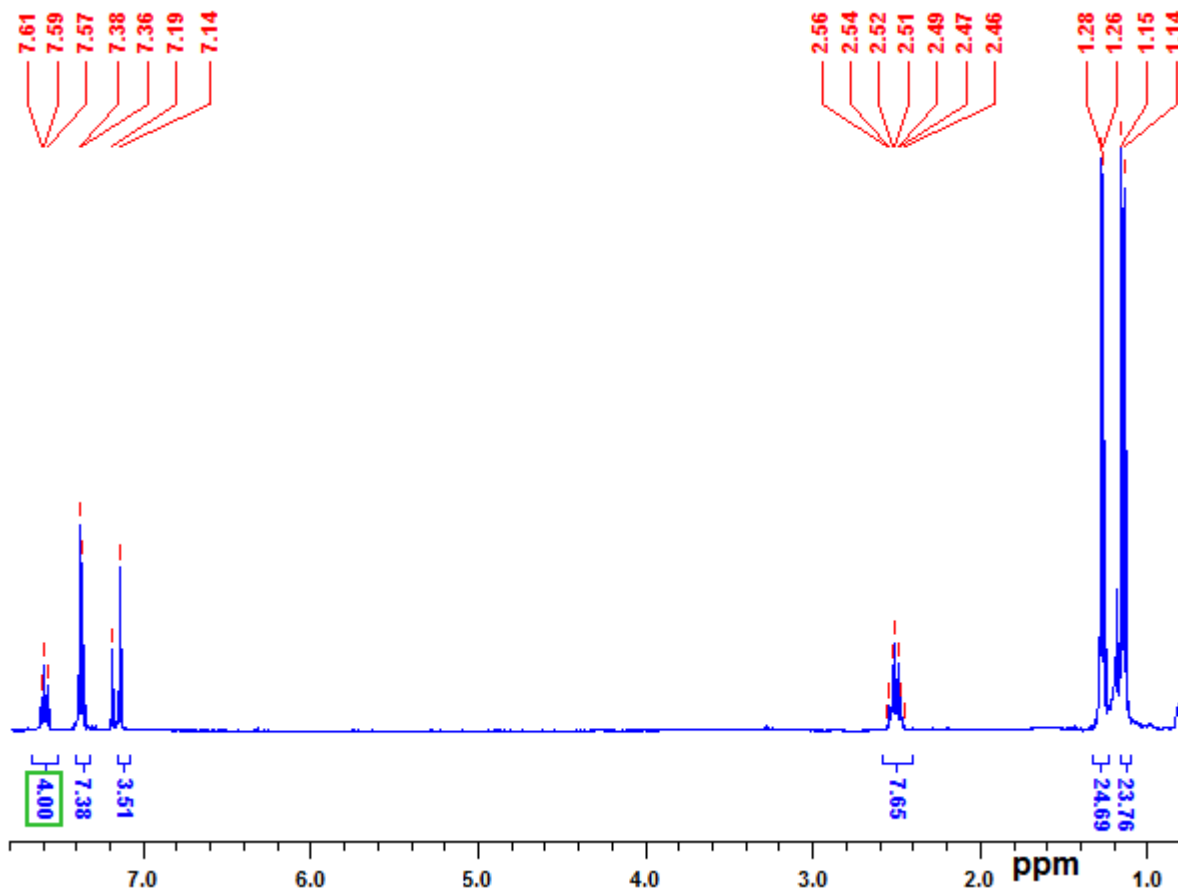

**Fig. S19.**  $^1\text{H}$  NMR spectrum of  $[(\text{IPrSe})_2\text{Cu}]\text{BF}_4$  (6).

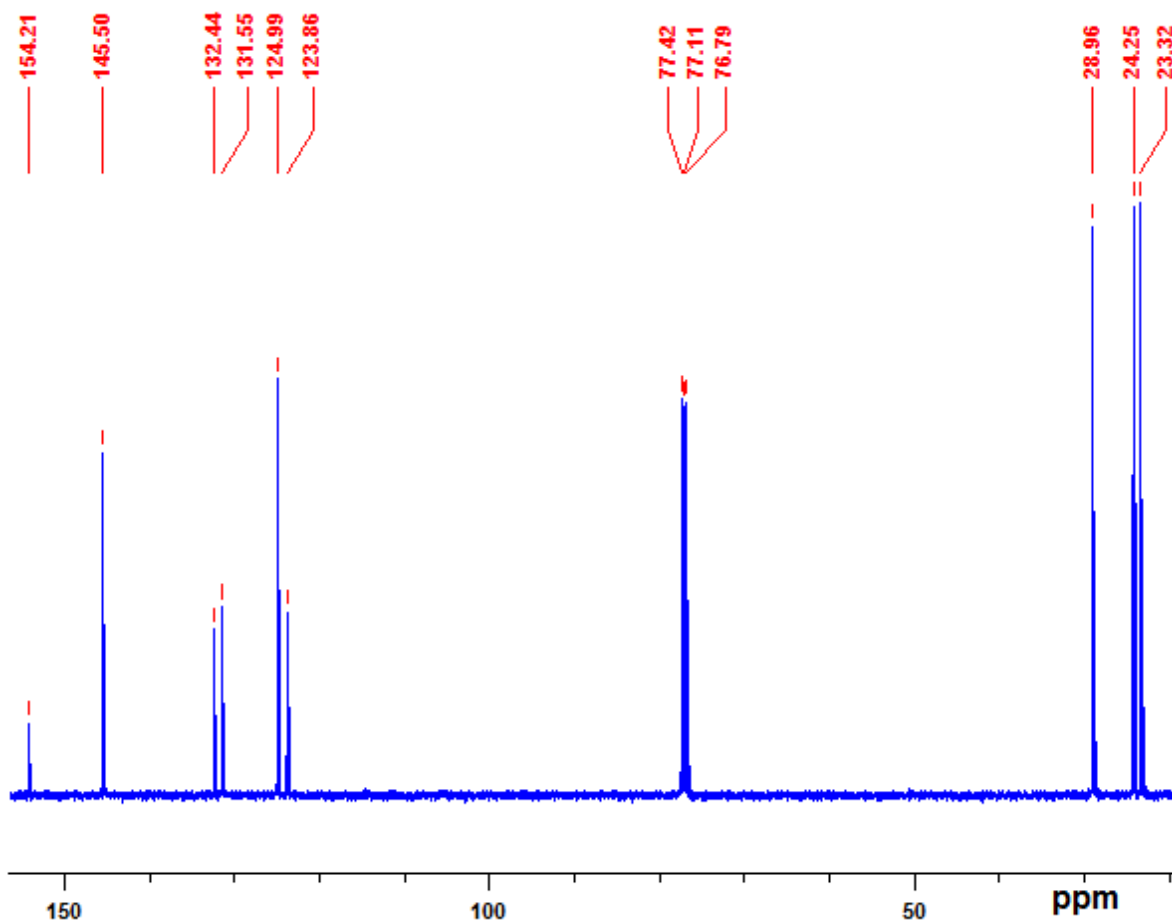

Fig. S20.  $^{13}\text{C}$  NMR spectrum of  $[(\text{IPrSe})_2\text{Cu}]\text{BF}_4$  (6).

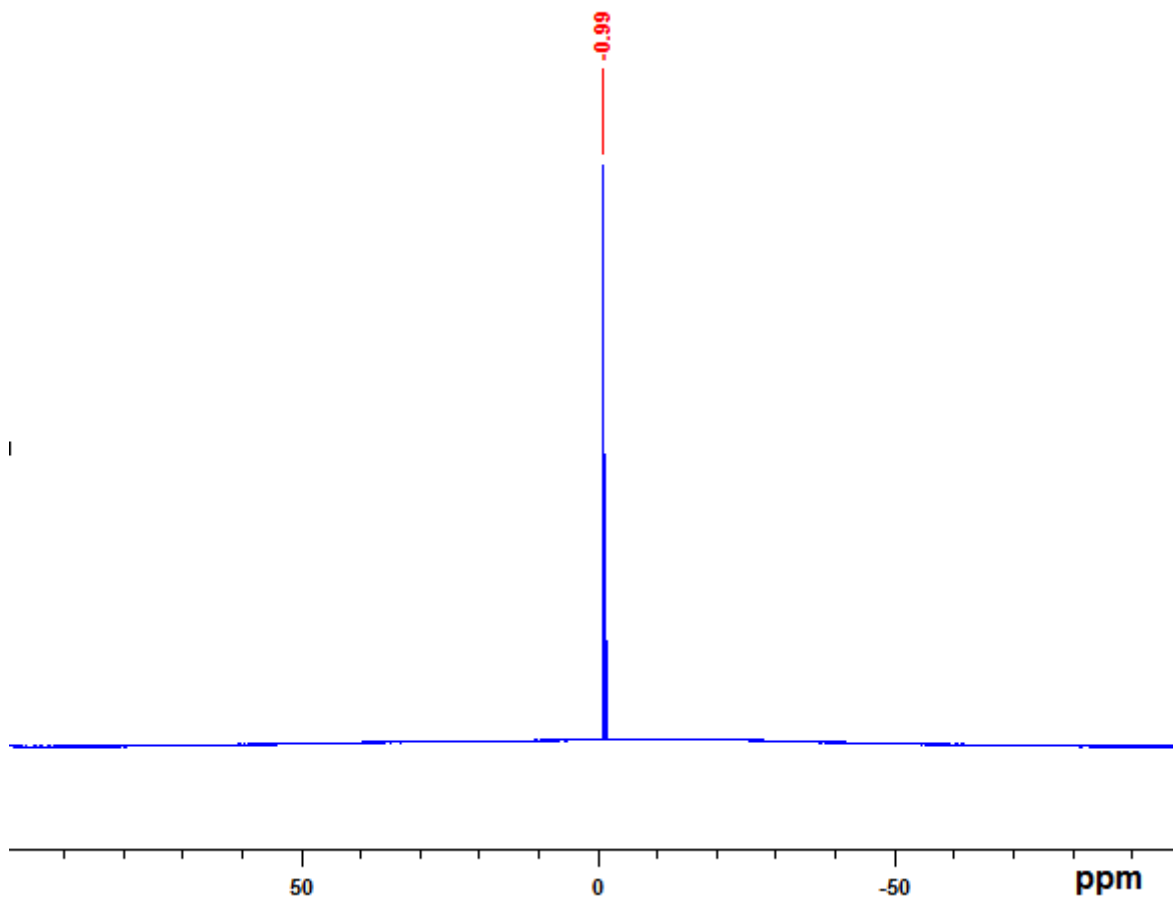

**Fig. S21.**  $^{11}\text{B}$  NMR spectrum of  $[(\text{IPrSe})_2\text{Cu}]\text{BF}_4$  (**6**).

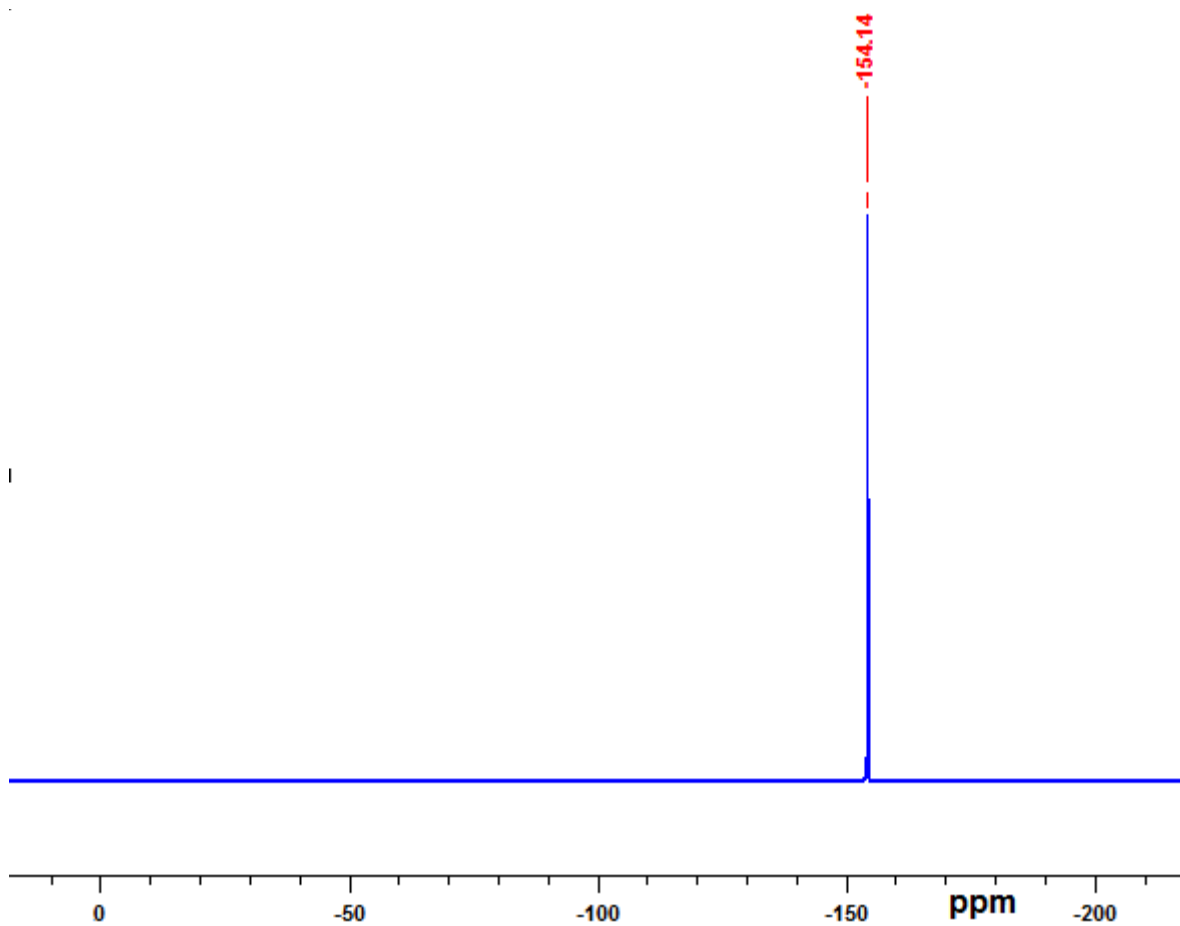

**Fig. S22.**  $^{19}\text{F}$  NMR spectrum of  $[(\text{IPrSe})_2\text{Cu}]\text{BF}_4$  (**6**).

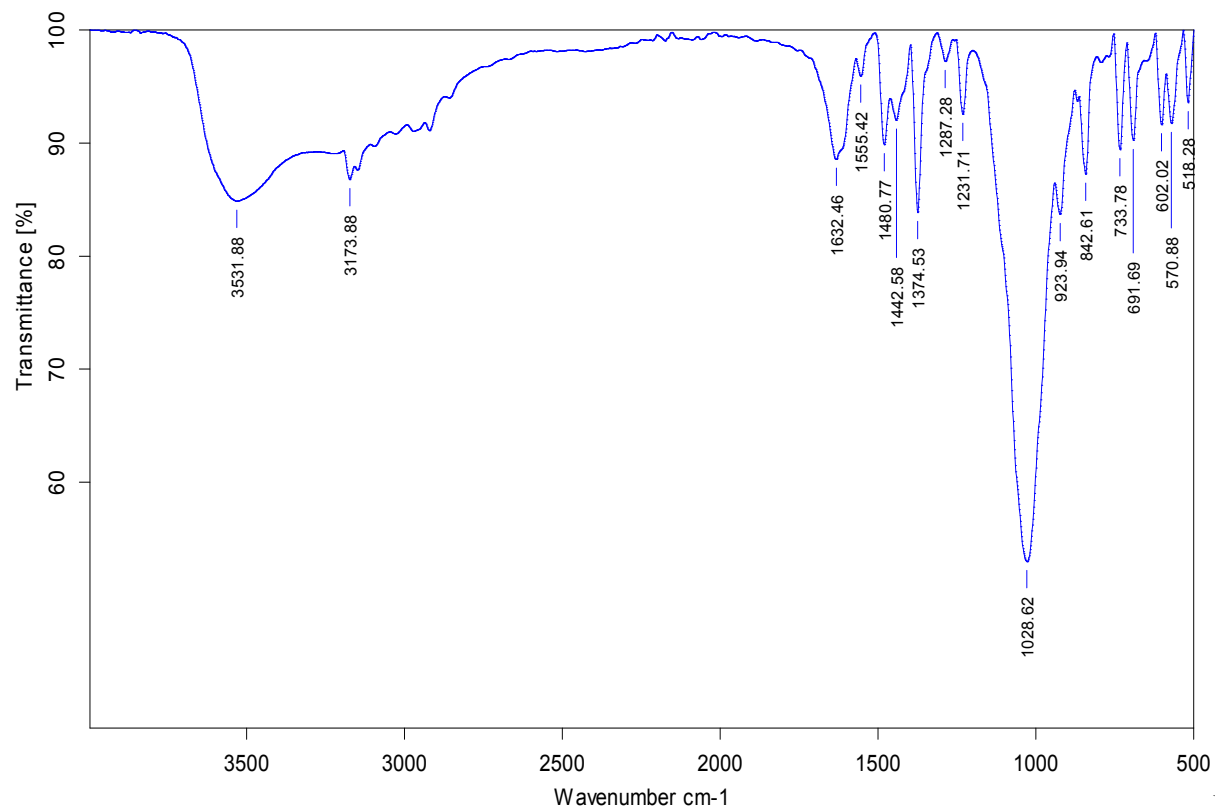

**g. S23.** Neat FT-IR spectrum of [(IMesS)<sub>2</sub>Cu]BF<sub>4</sub> (7).

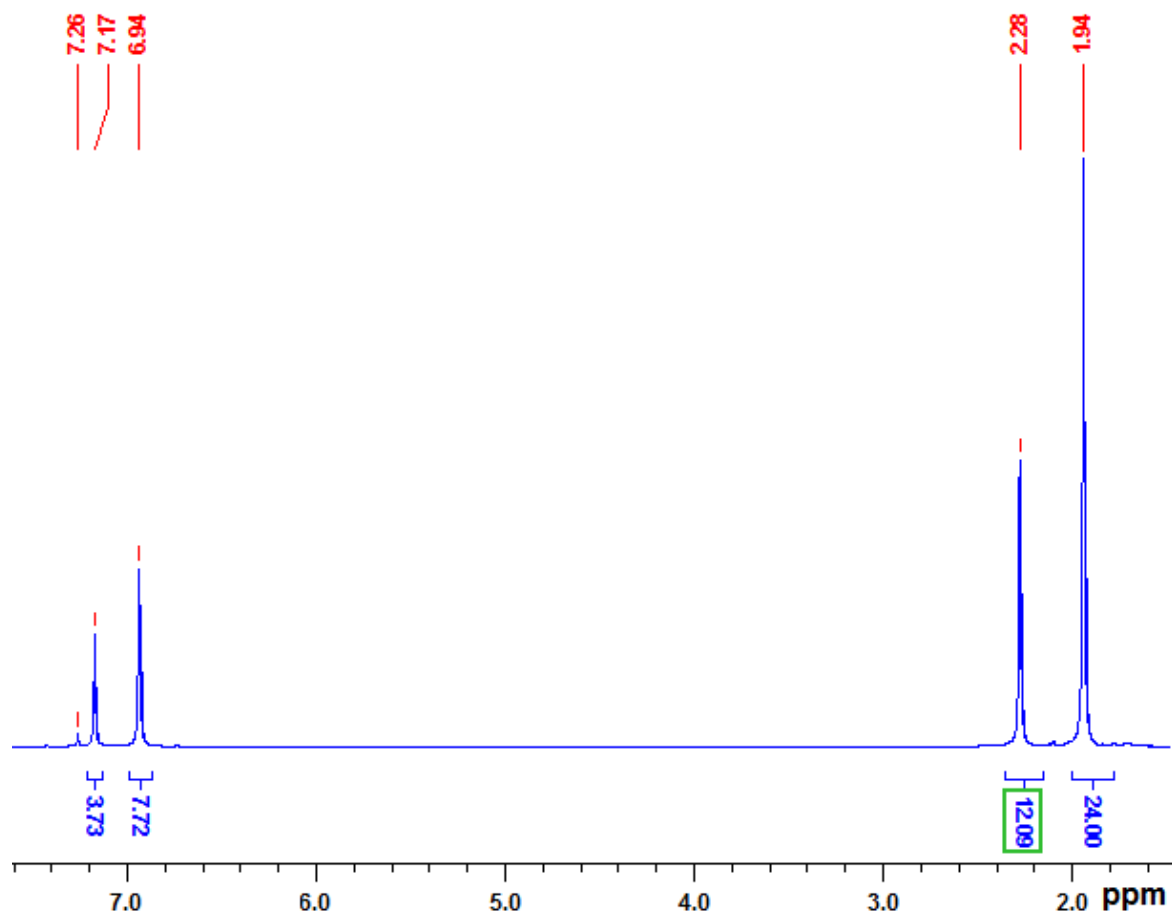

Fig. S24. <sup>1</sup>H NMR spectrum of [(IMesS)<sub>2</sub>Cu]BF<sub>4</sub> (7).



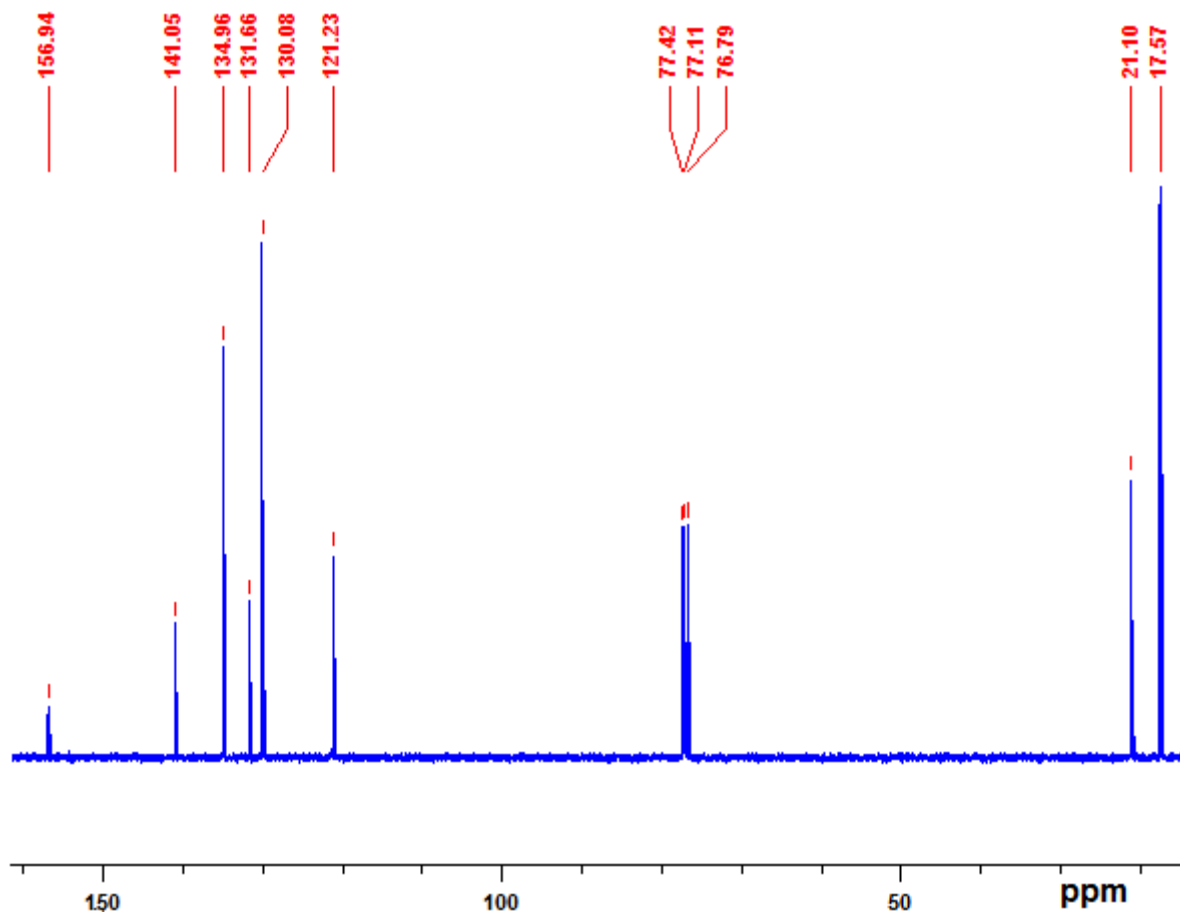

Fig. S25.  $^{13}\text{C}$  NMR spectrum of  $[(\text{IMesS})_2\text{Cu}]\text{BF}_4$  (7).

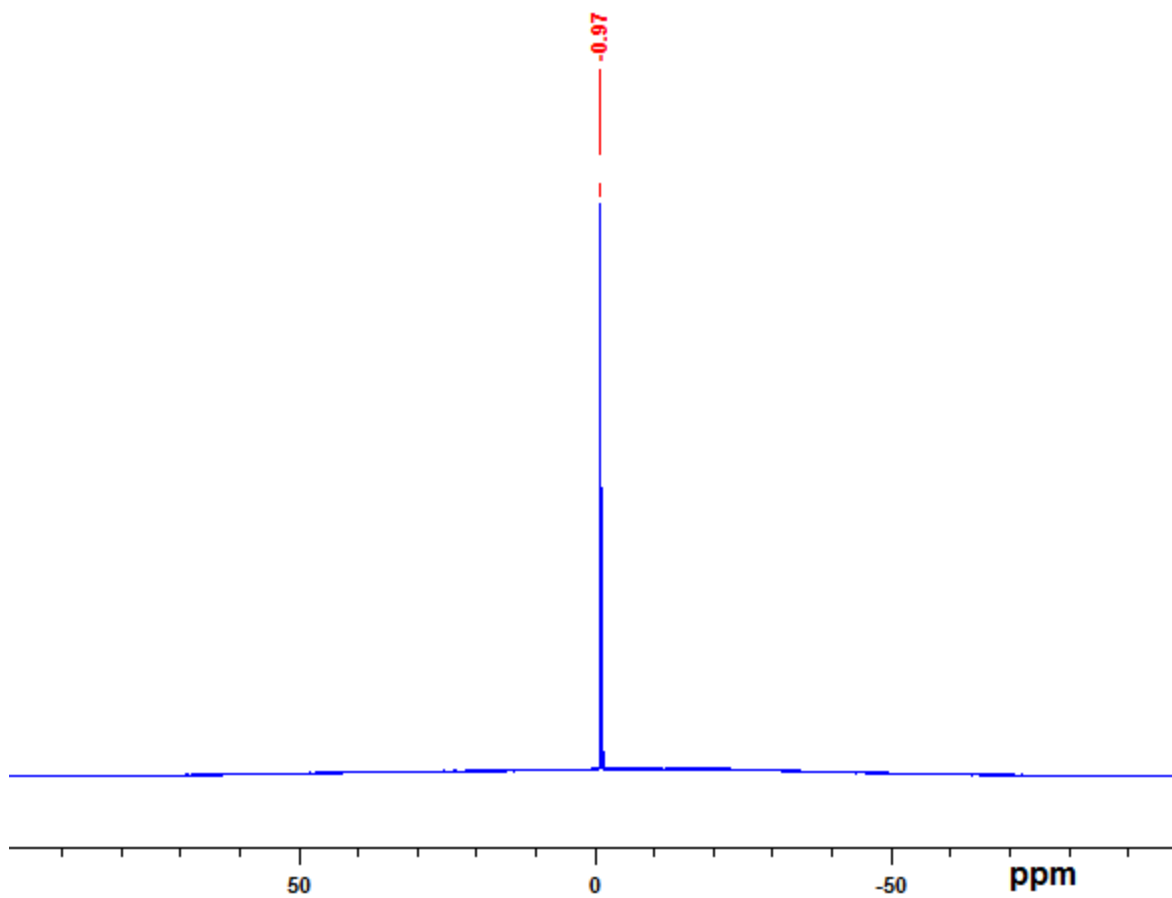

**Fig. S26.**  $^{11}\text{B}$  NMR spectrum of  $[(\text{IMesS})_2\text{Cu}]\text{BF}_4$  (**7**).

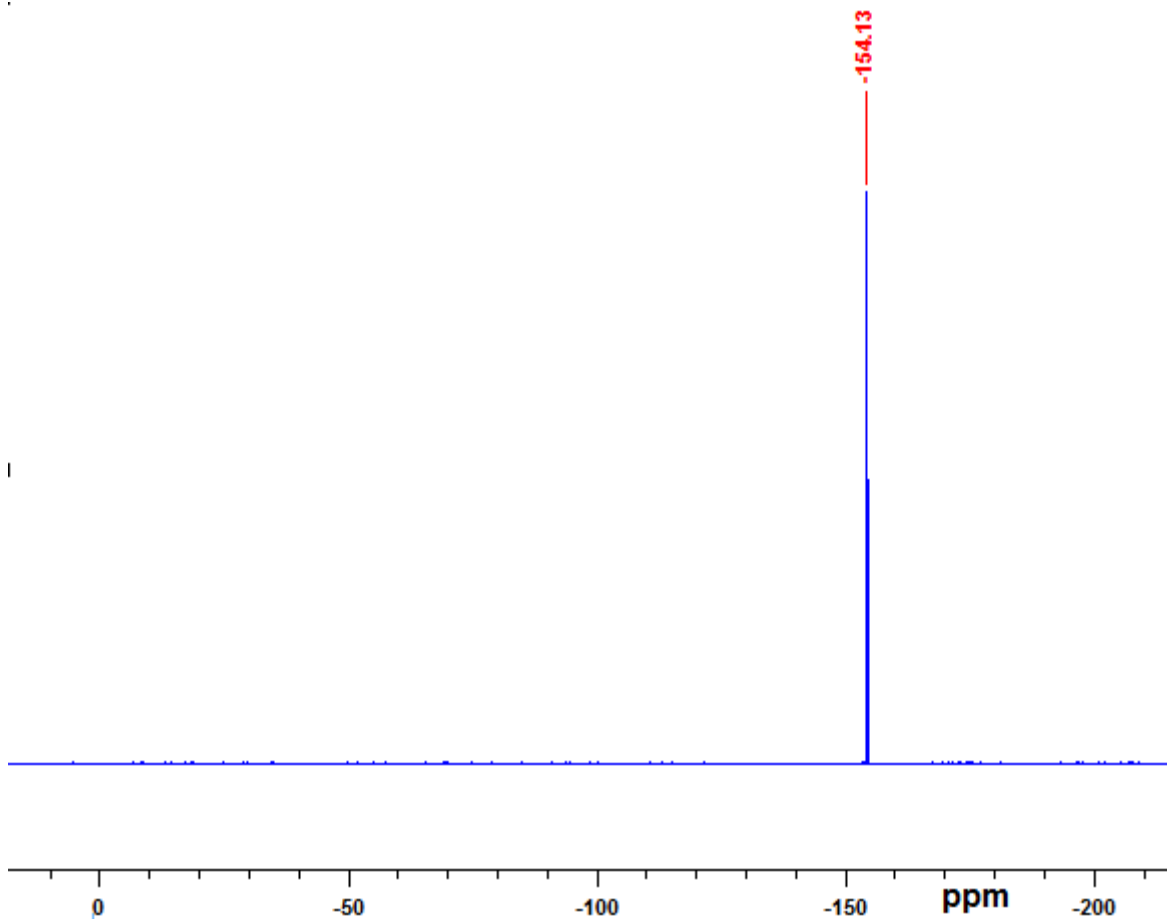

**Fig. S27.**  $^{19}\text{F}$  NMR spectrum of  $[(\text{IMesS})_2\text{Cu}]\text{BF}_4$  (7).

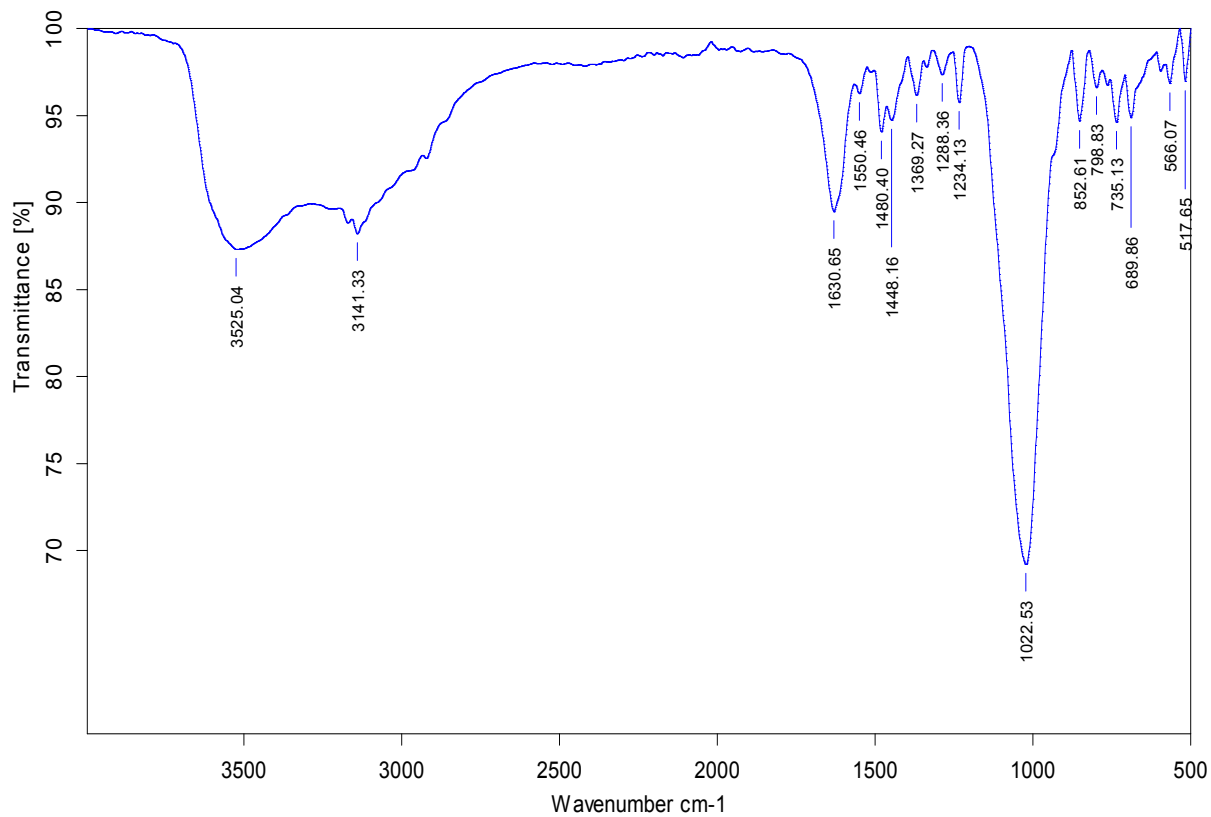

**Fig. S28.** Neat FT-IR spectrum of [(IMesSe)<sub>2</sub>Cu]BF<sub>4</sub> (**8**).

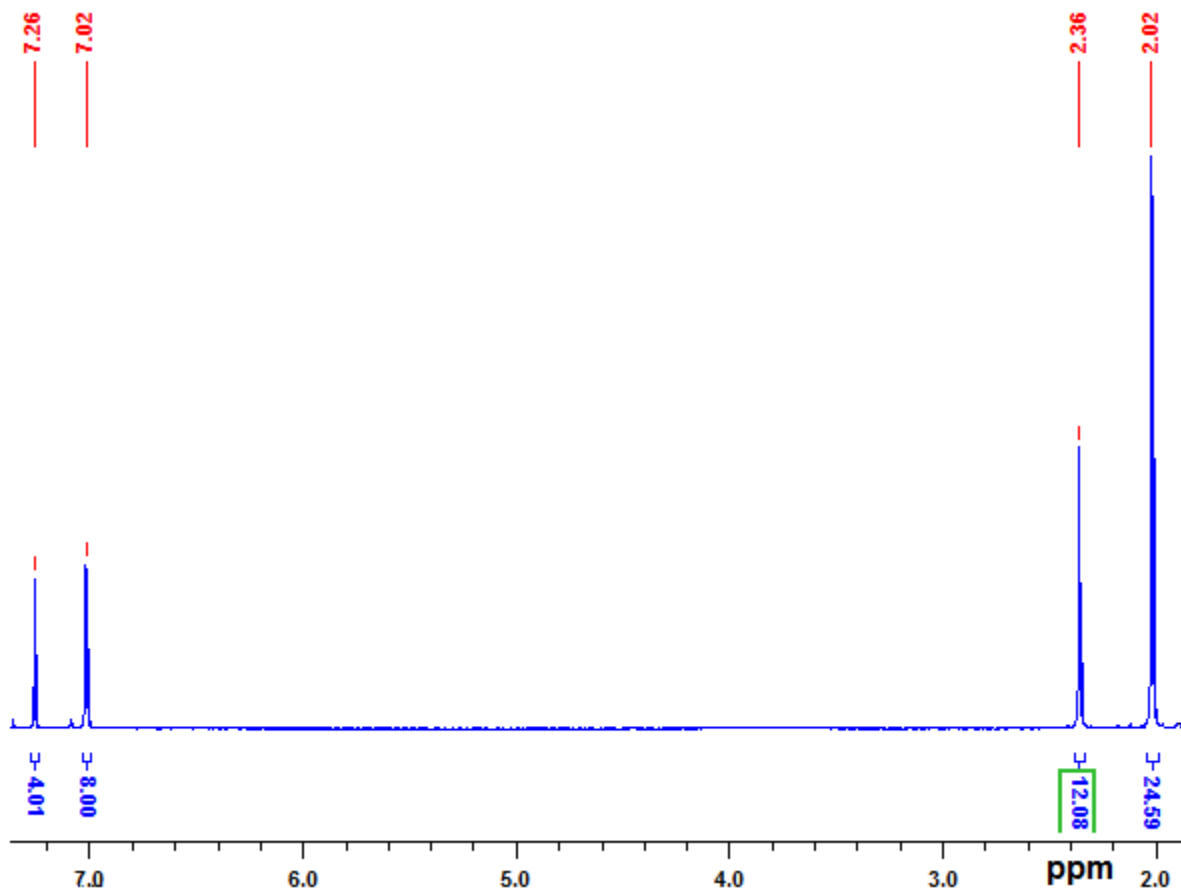

Fig. S29.  $^1\text{H}$  NMR spectrum of  $[(\text{IMesSe})_2\text{Cu}]\text{BF}_4$  (8).

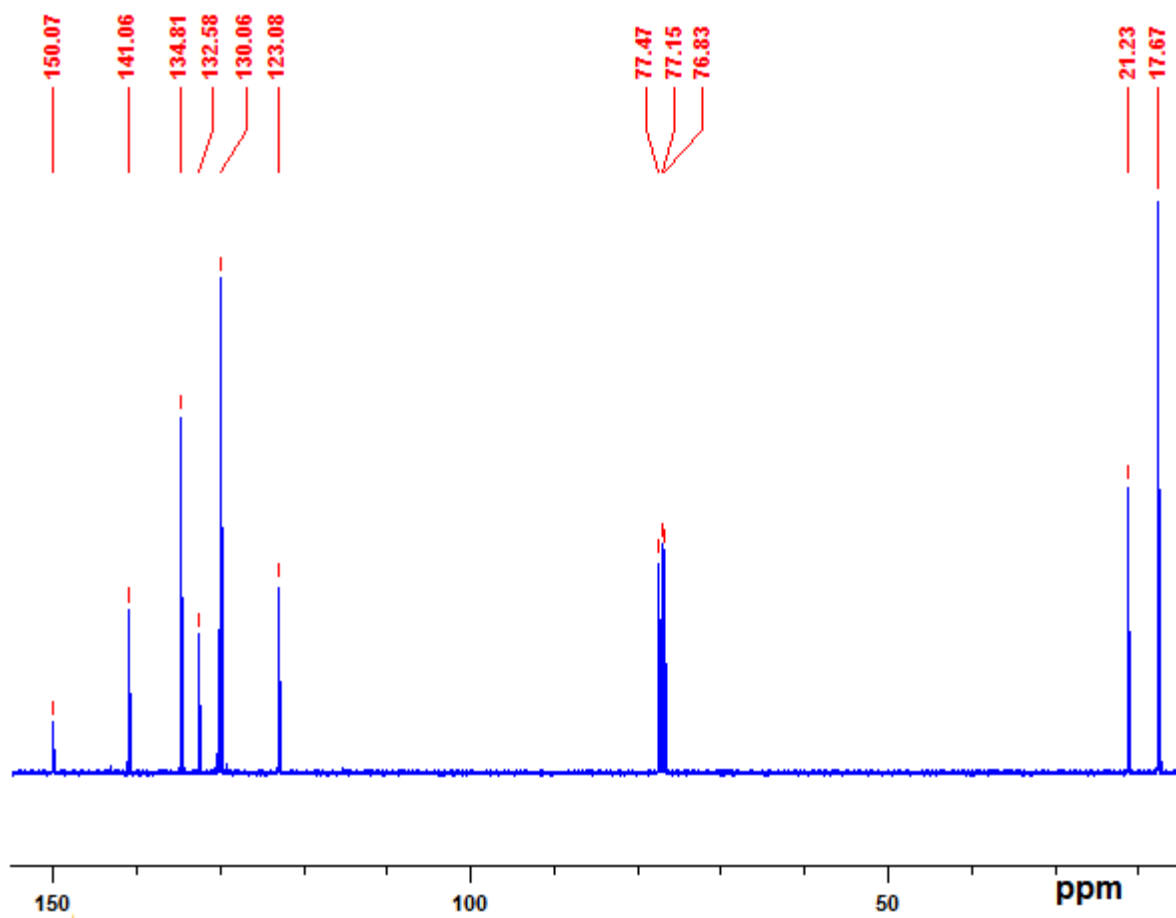

Fig. S30.  $^{13}\text{C}$  NMR spectrum of  $[(\text{IMesSe})_2\text{Cu}]\text{BF}_4$  (8).

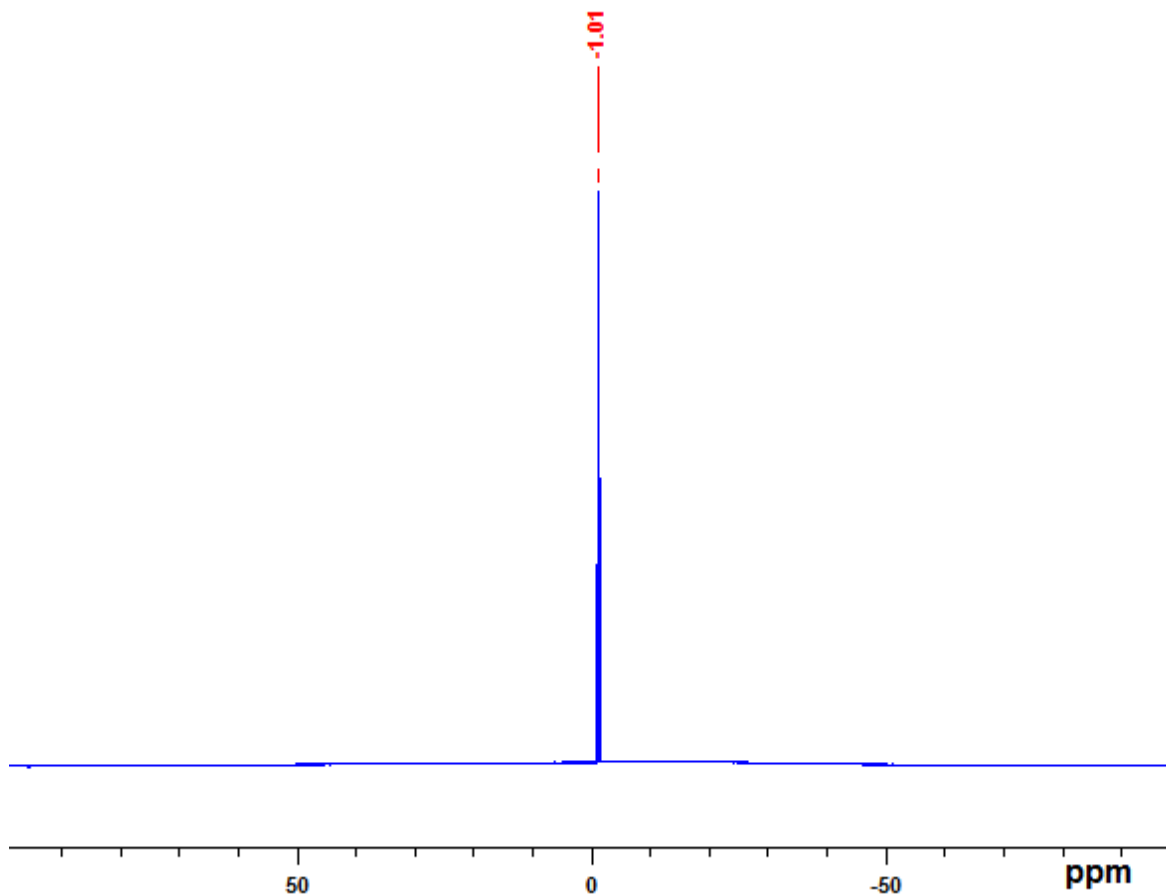

**Fig. S31.**  $^{11}\text{B}$  NMR spectrum of  $[(\text{IMesSe})_2\text{Cu}]\text{BF}_4$  (**8**).

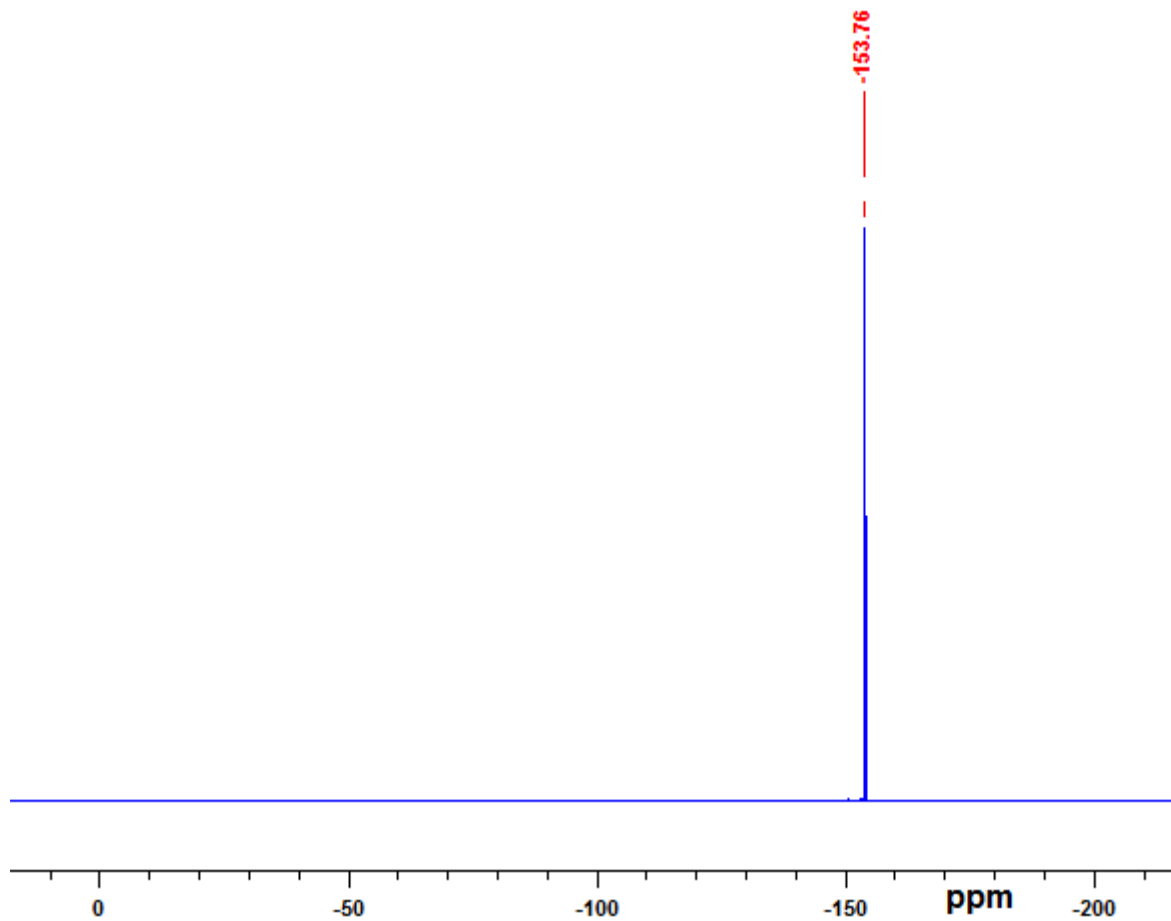

**Fig. S32.**  $^{19}\text{F}$  NMR spectrum of  $[(\text{IMesSe})_2\text{Cu}]\text{BF}_4$  (**8**).



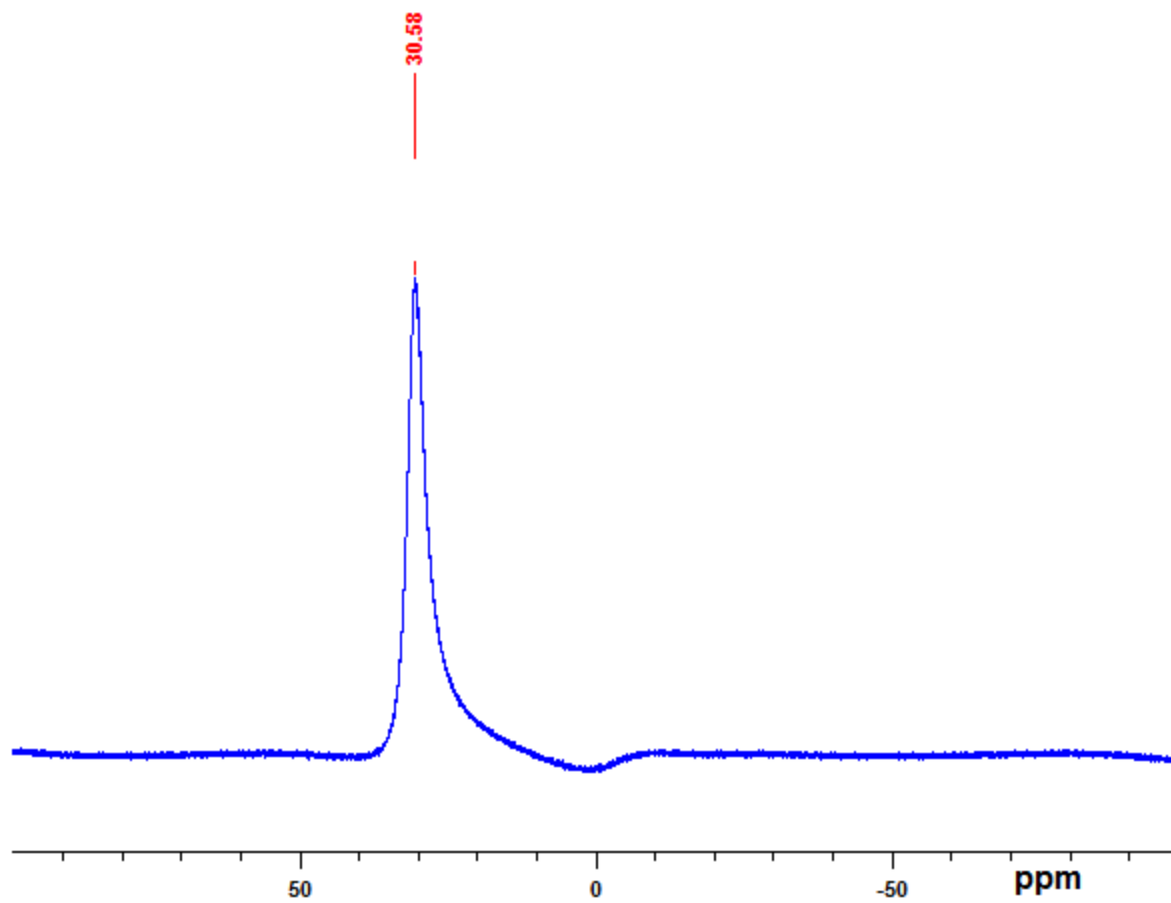

**Fig. S33.**  $^{11}\text{B}$  NMR spectrum of (Z)-4,4,5,5-tetramethyl-2-(1-phenylprop-1-en-2-yl)-1,3,2-dioxaborolane.

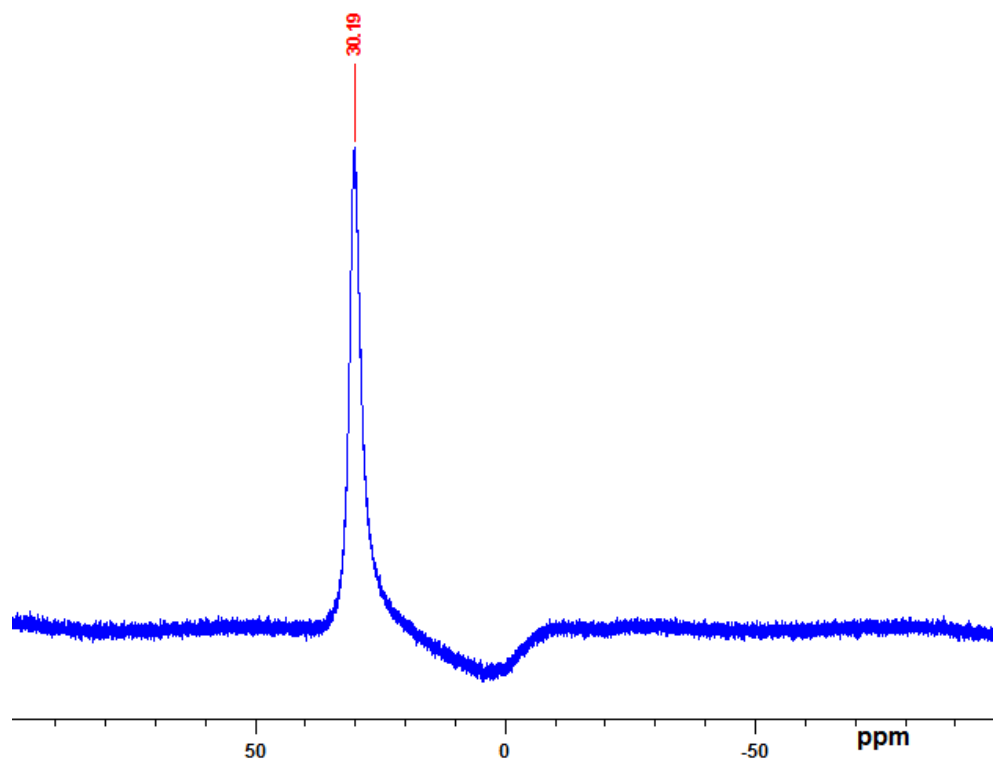

**Fig. S34.**  $^{11}\text{B}$  NMR spectrum of (*E*)-4,4,5,5-tetramethyl-2-styryl-1,3,2-dioxaborolane.

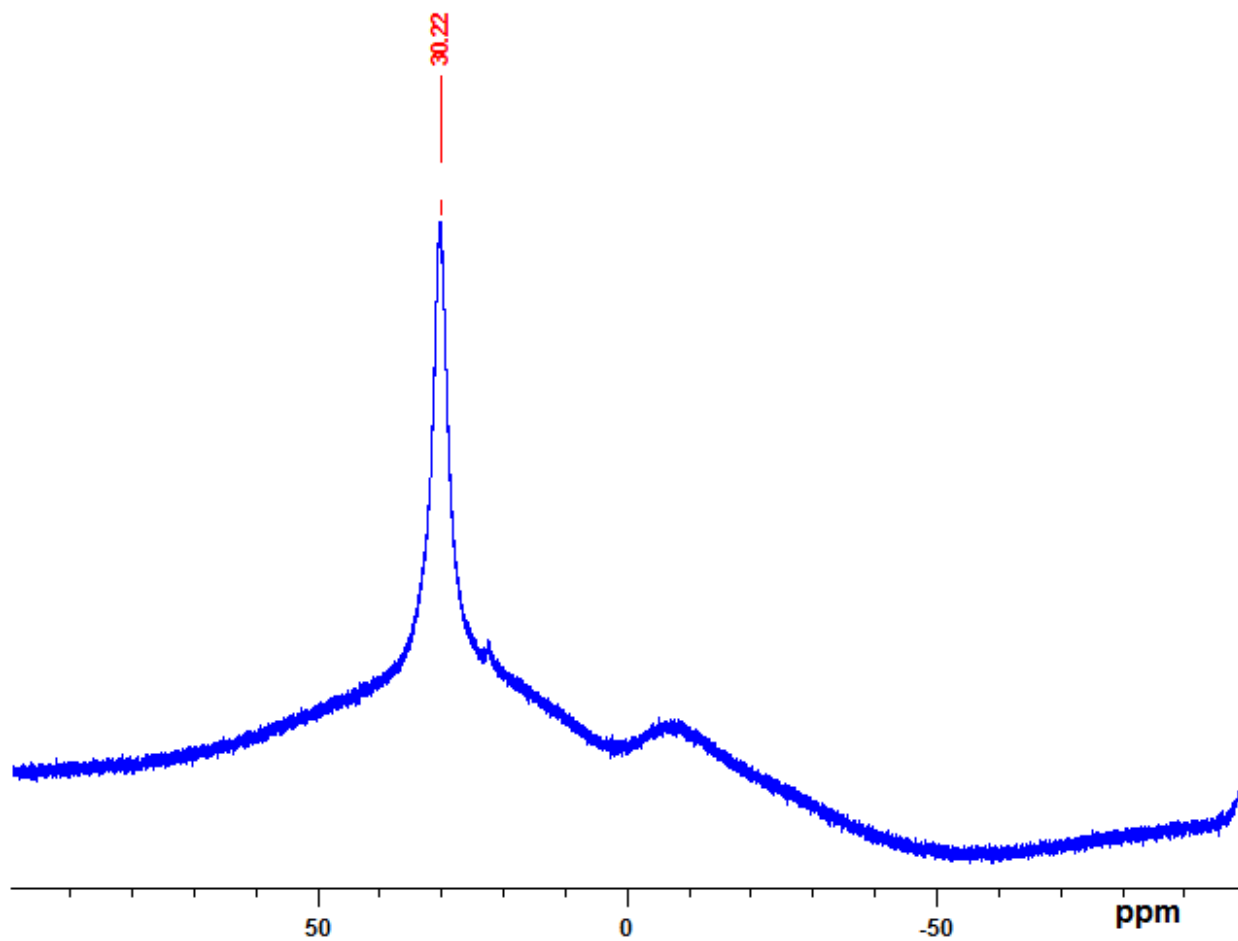

**Fig. S35.**  $^{11}\text{B}$  NMR spectrum of (Z)-4,4,5,5-tetramethyl-2-(1-phenylbut-1-en-2-yl)-1,3,2-dioxaborolane.

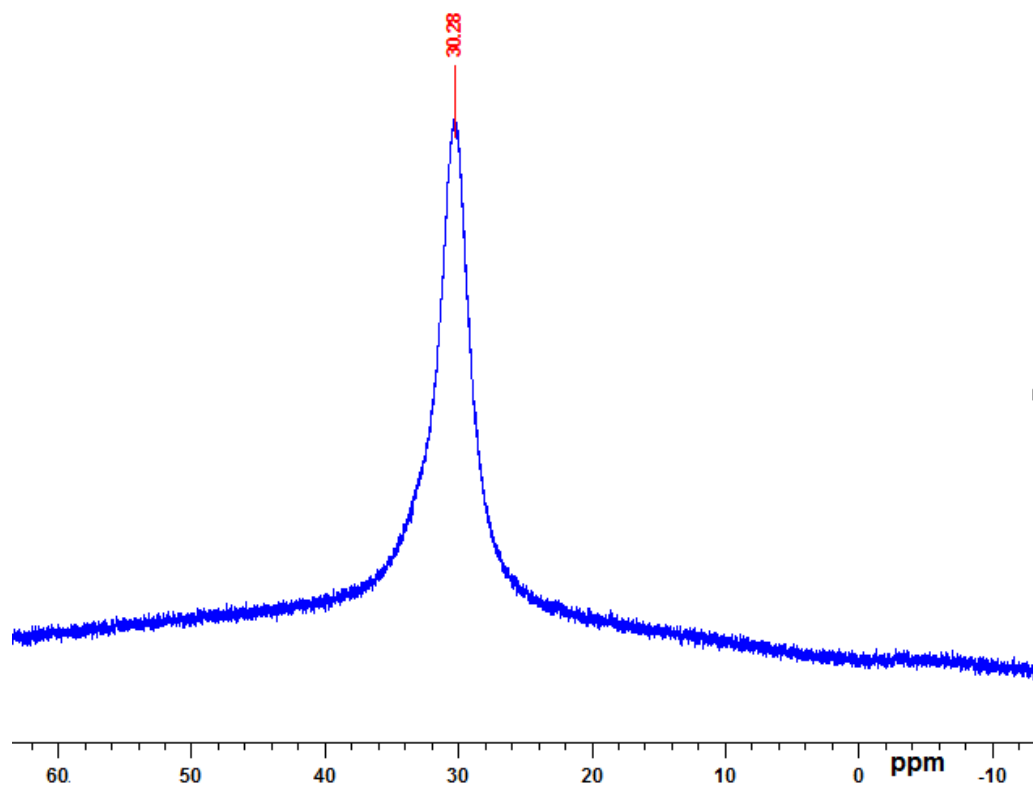

**Fig. S36.**  $^{11}\text{B}$  NMR spectrum of (Z) ethyl -3-phenyl-3-(4,4,5,5-tetramethyl-1,3,2-dioxaborolan-2-yl)acrylate.

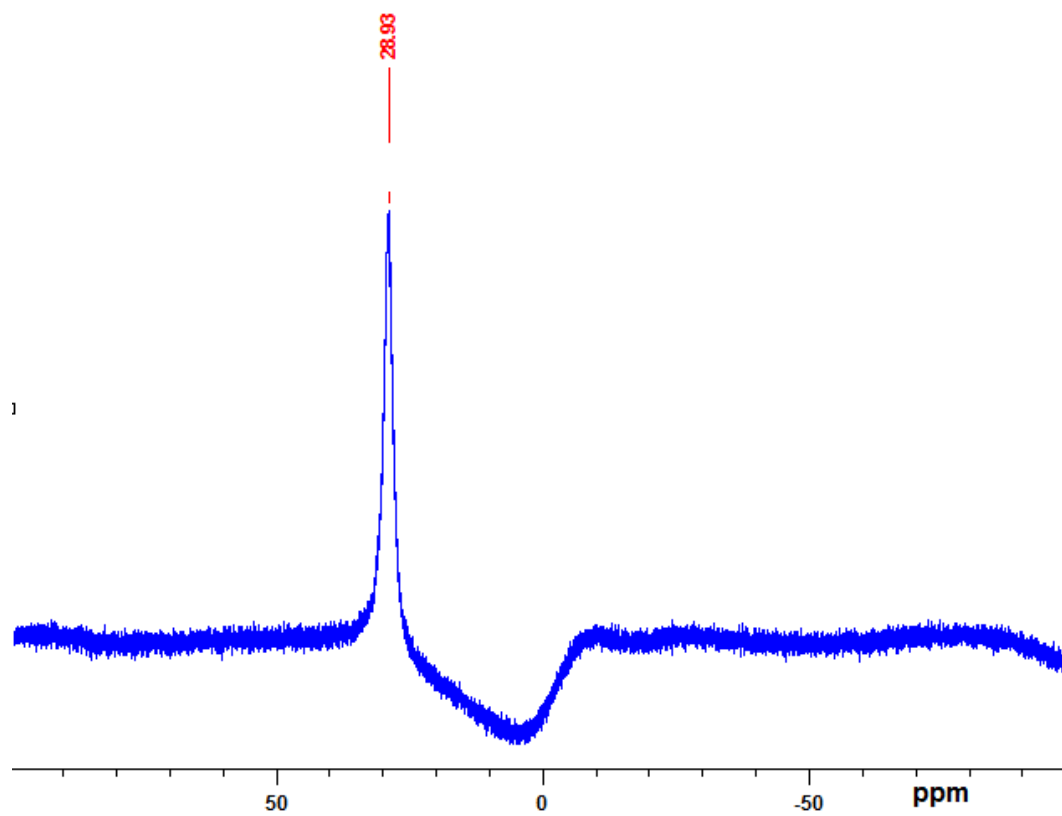

**Fig. S38.**  $^{11}\text{B}$  NMR spectrum of (Z)-2-(hex-2-en-2-yl)-4,4,5,5-tetramethyl-1,3,2-dioxaborolane.

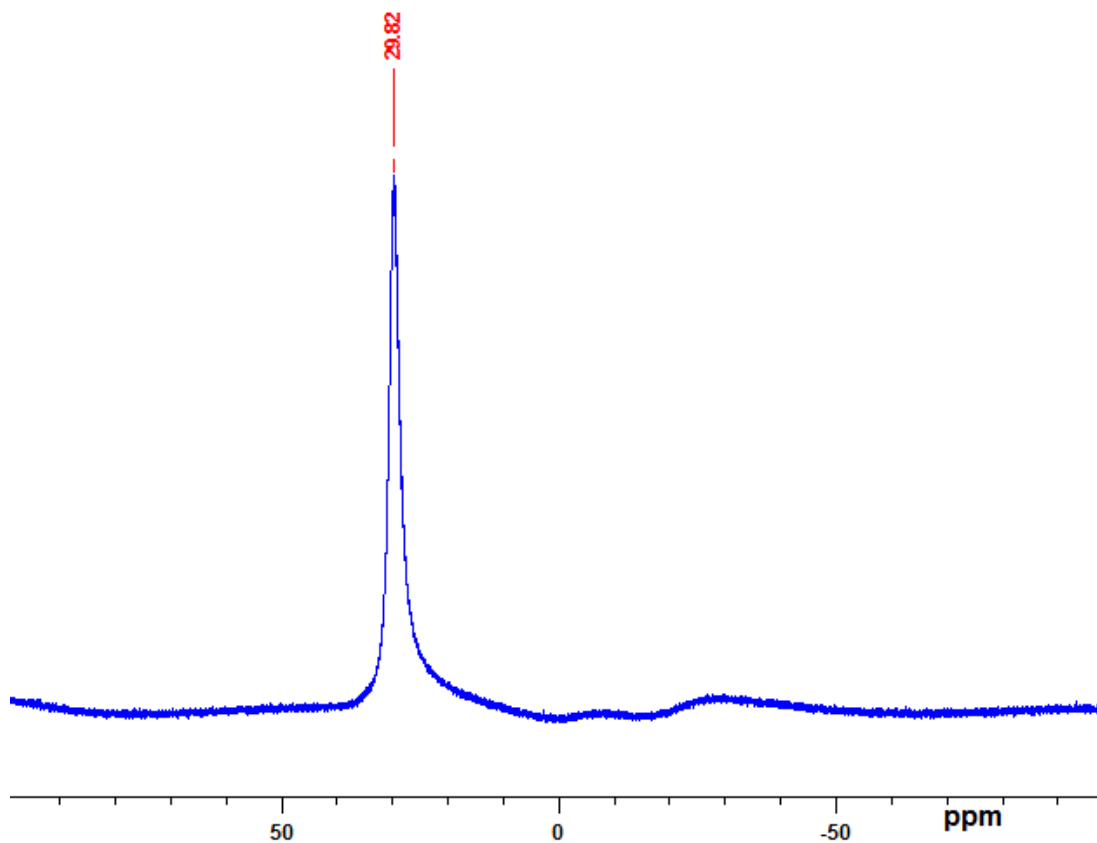

**Fig. S39.**  $^{11}\text{B}$  NMR spectrum of (E)-4,4,5,5-tetramethyl-2-(oct-1-en-1-yl)-1,3,2-dioxaborolane.

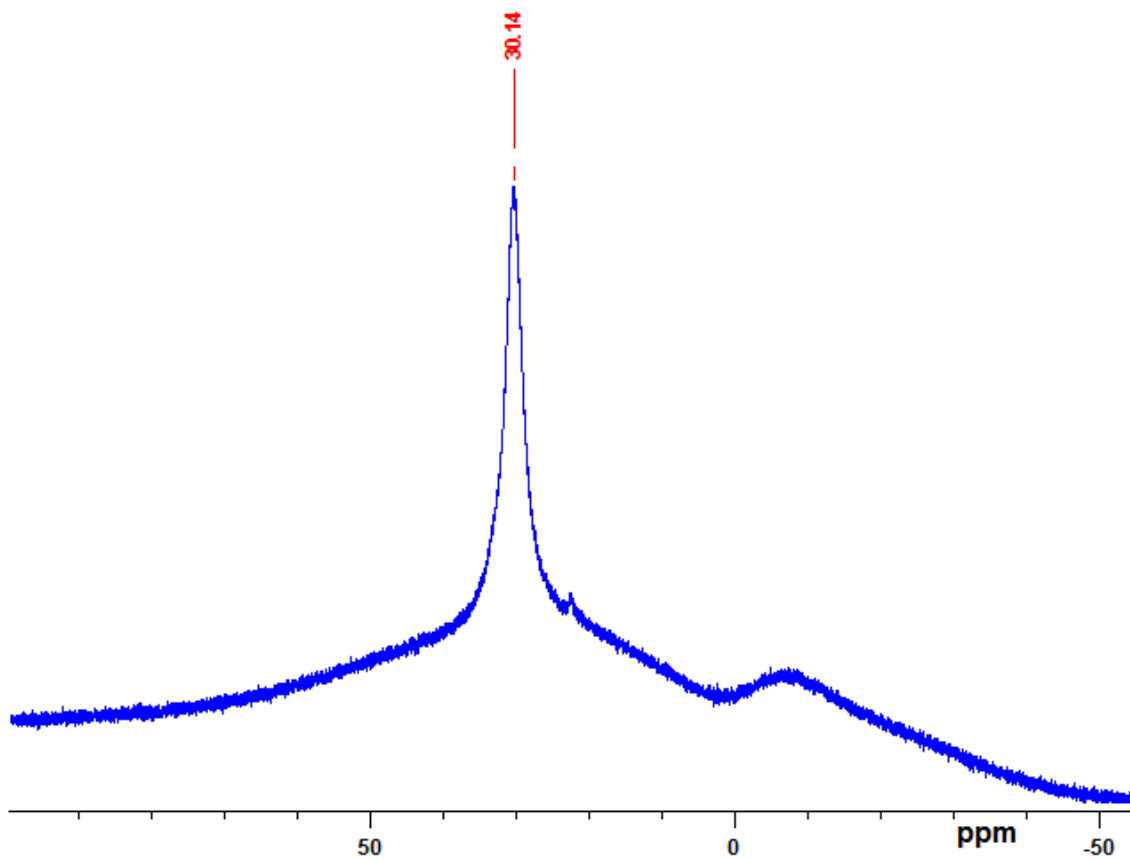

**Fig. S40.**  $^{11}\text{B}$  NMR spectrum of (Z)-4,4,5,5-Tetramethyl-2-(oct-2-en-2-yl)-1,3,2-dioxaborolane.

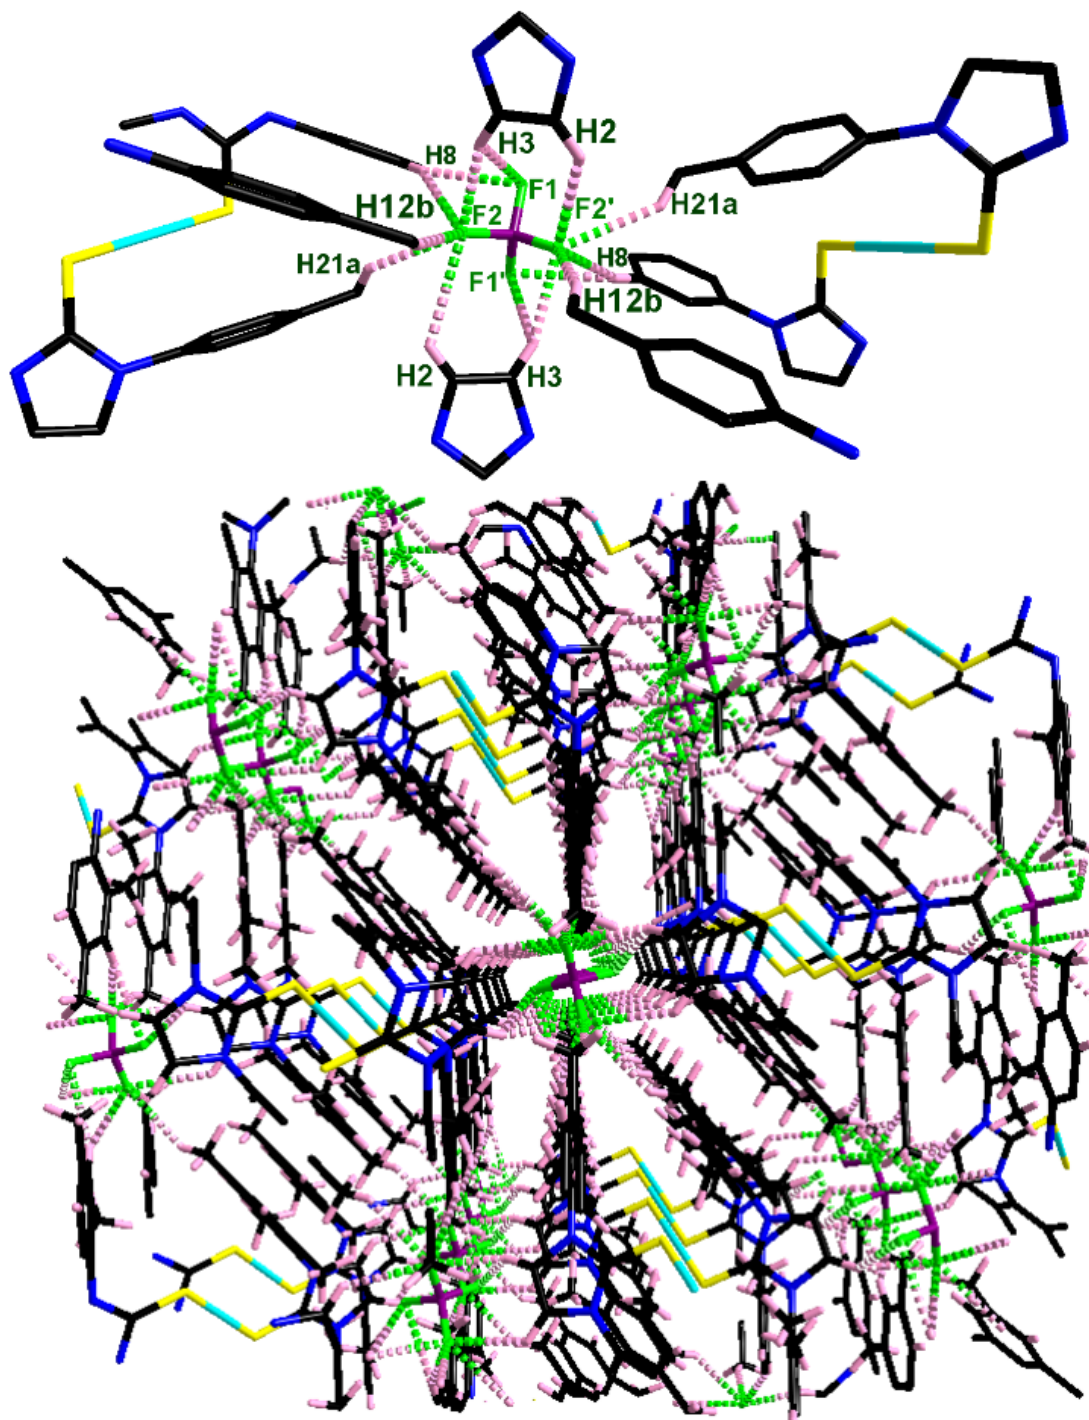

**Fig. S41.** Top; Intermolecular H-bonding interaction between the CH group (of aromatic ring and imidazole ring) with the F atom of tetra fluoro borate unit in **7**; D $\cdots$ A distances [ $\text{\AA}$ ]; F(1) $\cdots$ C(3)H, 2.6235(1); F(1) $\cdots$ C(8)H, 2.7145(1); F(2) $\cdots$ C(2)H, 2.8304(1); F(2) $\cdots$ C(12B)H, 2.7798(1); F(2) $\cdots$ C(21A)H, 2.5720(1). C–D $\cdots$ A angles [ $^\circ$ ]; B(1)–F(1)



$\cdots\text{H}(3)$ , 81.54;  $\text{B}(1)\text{--F}(1) \cdots\text{H}(8)$ , 94.64;  $\text{B}(1)\text{--F}(2) \cdots\text{H}(2)$ , 111.76;  $\text{B}(1)\text{--F}(2) \cdots\text{H}(3)$ , 95.22;  $\text{B}(1)\text{--F}(2) \cdots\text{H}(8)$ , 88.70;  $\text{B}(1)\text{--F}(2) \cdots\text{H}(12\text{b})$ , 137.55;  $\text{B}(1)\text{--F}(2) \cdots\text{H}(21\text{a})$ , 127.29. Non interacting hydrogen atoms and methyl groups have been omitted for the clarity. Bottom; Molecular association of **7** in solid state through extensive  $\text{H}\cdots\text{F}$  bonding.

---



**Table S1.** Structural parameters of compounds **1-4**.

|                                                      | <b>1</b>                                                                         | <b>2</b>                                                                          | <b>3</b>                                                                             | <b>4</b>                                                                             |
|------------------------------------------------------|----------------------------------------------------------------------------------|-----------------------------------------------------------------------------------|--------------------------------------------------------------------------------------|--------------------------------------------------------------------------------------|
| Empirical formula                                    | C <sub>54</sub> H <sub>69</sub> ClCuN <sub>4</sub> O <sub>4</sub> S <sub>2</sub> | C <sub>54</sub> H <sub>72</sub> N <sub>4</sub> O <sub>4</sub> ClCuSe <sub>2</sub> | C <sub>42</sub> H <sub>48</sub> N <sub>4</sub> O <sub>4</sub> ClCu<br>S <sub>2</sub> | C <sub>42</sub> H <sub>48</sub> N <sub>4</sub> CuSe <sub>2</sub><br>ClO <sub>4</sub> |
| Formula weight                                       | 1001.25                                                                          | 1098.12                                                                           | 835.96                                                                               | 929.79                                                                               |
| Temperature (K)                                      | 298                                                                              | 150                                                                               | 298                                                                                  | 150                                                                                  |
| Crystal system                                       | Monoclinic                                                                       | Monoclinic                                                                        | Monoclinic                                                                           | Orthorhombic                                                                         |
| Space group                                          | C2/c                                                                             | C2/c                                                                              | C2/c                                                                                 | P2 <sub>1</sub> 2 <sub>1</sub> 2 <sub>1</sub>                                        |
| <i>a</i> /Å                                          | 19.8863(14)                                                                      | 19.5343(15)                                                                       | 21.1509(9)                                                                           | 8.3174(3)                                                                            |
| <i>b</i> /Å                                          | 15.9337(4)                                                                       | 16.1976(6)                                                                        | 8.2603(3)                                                                            | 17.8053(5)                                                                           |
| <i>c</i> /Å                                          | 20.405(3)                                                                        | 21.4008(15)                                                                       | 24.586(1)                                                                            | 28.9437(7)                                                                           |
| $\alpha$ <sup>o</sup>                                | 90                                                                               | 90                                                                                | 90                                                                                   | 90                                                                                   |
| $\beta$ <sup>o</sup>                                 | 114.235(8)                                                                       | 121.691(10)                                                                       | 101.678(4)                                                                           | 90                                                                                   |
| $\gamma$ <sup>o</sup>                                | 90                                                                               | 90                                                                                | 90                                                                                   | 90                                                                                   |
| Volume (Å <sup>3</sup> )                             | 5895.8(10)                                                                       | 5761.7(9)                                                                         | 4206.5(3)                                                                            | 4286.4(2)                                                                            |
| <i>Z</i>                                             | 4                                                                                | 4                                                                                 | 4                                                                                    | 4                                                                                    |
| $\rho_{\text{calc}}/\text{mg mm}^{-3}$               | 1.128                                                                            | 1.2658                                                                            | 1.3200                                                                               | 1.4407                                                                               |
| Absorption coefficient ( $\mu/\text{mm}^{-1}$ )      | 1.931                                                                            | 2.744                                                                             | 2.602                                                                                | 3.586                                                                                |
| <i>F</i> (000)                                       | 2124.0                                                                           | 2272.4                                                                            | 1752.6                                                                               | 1887.5                                                                               |
| Reflections collected                                | 12751                                                                            | 10957                                                                             | 8849                                                                                 | 11109                                                                                |
| <i>R</i> <sub>int</sub>                              | 0.0308                                                                           | 0.0354                                                                            | 0.0277                                                                               | 0.0363                                                                               |
| GOF on <i>F</i> <sup>2</sup>                         | 1.650                                                                            | 1.039                                                                             | 1.030                                                                                | 1.035                                                                                |
| <i>R</i> <sub>1</sub> ( <i>I</i> > 2σ( <i>I</i> ))   | 0.0868                                                                           | 0.0766                                                                            | 0.0481                                                                               | 0.0480                                                                               |
| w <i>R</i> <sub>2</sub> ( <i>I</i> > 2σ( <i>I</i> )) | 0.2510                                                                           | 0.233171                                                                          | 0.145660                                                                             | 0.140271                                                                             |
| <i>R</i> <sub>1</sub> values (all data)              | 0.1097                                                                           | 0.0866                                                                            | 0.0642                                                                               | 0.0551                                                                               |
| <i>R</i> <sub>2</sub> values (all data)              | 0.2710                                                                           | 0.2332                                                                            | 0.1457                                                                               | 0.1403                                                                               |

**Table S2.** Structural parameters of compounds **5-8**.

|                                                      | <b>5</b>                                                                           | <b>6</b>                                                                            | <b>7</b>                                                                            | <b>8</b>                                                                            |
|------------------------------------------------------|------------------------------------------------------------------------------------|-------------------------------------------------------------------------------------|-------------------------------------------------------------------------------------|-------------------------------------------------------------------------------------|
| Empirical formula                                    | C <sub>54</sub> H <sub>72</sub> N <sub>4</sub> S <sub>2</sub><br>CuBF <sub>4</sub> | C <sub>54</sub> H <sub>72</sub> BN <sub>4</sub> F <sub>4</sub><br>CuSe <sub>2</sub> | C <sub>42</sub> H <sub>48</sub> BN <sub>4</sub> F <sub>4</sub><br>S <sub>2</sub> Cu | C <sub>42</sub> H <sub>48</sub> BCuF <sub>4</sub><br>N <sub>4</sub> Se <sub>2</sub> |
| Formula weight                                       | 991.70                                                                             | 1085.44                                                                             | 823.32                                                                              | 917.16                                                                              |
| Temperature (K)                                      | 298                                                                                | 150                                                                                 | 150                                                                                 | 150                                                                                 |
| Crystal system                                       | Monoclinic                                                                         | Monoclinic                                                                          | Monoclinic                                                                          | Monoclinic                                                                          |
| Space group                                          | C2/c                                                                               | C2/c                                                                                | C2/c                                                                                | C2/c                                                                                |
| <i>a</i> /Å                                          | 19.9289(11)                                                                        | 19.6185(8)                                                                          | 20.0772(7)                                                                          | 19.9268(8)                                                                          |
| <i>b</i> /Å                                          | 15.8882(5)                                                                         | 16.1577(3)                                                                          | 8.2488(3)                                                                           | 8.3983(3)                                                                           |
| <i>c</i> /Å                                          | 20.3741(16)                                                                        | 21.2244(9)                                                                          | 24.7461(10)                                                                         | 24.7922(10)                                                                         |
| $\alpha$ /°                                          | 90                                                                                 | 90                                                                                  | 90                                                                                  | 90                                                                                  |
| $\beta$ /°                                           | 114.824(8)                                                                         | 121.810(6)                                                                          | 101.745(4)                                                                          | 100.413(4)                                                                          |
| $\gamma$ /°                                          | 90                                                                                 | 90                                                                                  | 90                                                                                  | 90                                                                                  |
| Volume (Å <sup>3</sup> )                             | 5855.1(7)                                                                          | 5717.4(5)                                                                           | 4012.5(3)                                                                           | 4080.6(3)                                                                           |
| <i>Z</i>                                             | 4                                                                                  | 4                                                                                   | 4                                                                                   | 4                                                                                   |
| $\rho_{\text{calc}}/\text{mg mm}^{-3}$               | 1.1249                                                                             | 1.2609                                                                              | 1.3629                                                                              | 1.4928                                                                              |
| Absorption coefficient ( $\mu/\text{mm}^{-1}$ )      | 1.574                                                                              | 2.385                                                                               | 2.188                                                                               | 3.235                                                                               |
| <i>F</i> (000)                                       | 2104.4                                                                             | 2239.3                                                                              | 1719.5                                                                              | 1854.4                                                                              |
| Reflections collected                                | 11826                                                                              | 10507                                                                               | 6872                                                                                | 6844                                                                                |
| <i>R</i> <sub>int</sub>                              | 0.0346                                                                             | 0.0221                                                                              | 0.0220                                                                              | 0.0240                                                                              |
| GOF on <i>F</i> <sup>2</sup>                         | 1.067                                                                              | 1.031                                                                               | 1.049                                                                               | 1.052                                                                               |
| <i>R</i> <sub>1</sub> ( <i>I</i> > 2σ( <i>I</i> ))   | 0.0865                                                                             | 0.0736                                                                              | 0.0383                                                                              | 0.0391                                                                              |
| w <i>R</i> <sub>2</sub> ( <i>I</i> > 2σ( <i>I</i> )) | 0.295348                                                                           | 0.235445                                                                            | 0.108046                                                                            | 0.106102                                                                            |
| <i>R</i> <sub>1</sub> values (all data)              | 0.1127                                                                             | 0.0763                                                                              | 0.0442                                                                              | 0.0433                                                                              |
| <i>R</i> <sub>2</sub> values (all data)              | 0.2953                                                                             | 0.2354                                                                              | 0.1080                                                                              | 0.1061                                                                              |
